# Supplementary material for: Molecular basis for azetidine-2-carboxylic acid biosynthesis
Source: PubMed Central journal article supplement (PMC11794875; doi:10.1038/s41467-025-56610-6), 2025-02-04
Supplement: 41467_2025_56610_MOESM1_ESM.pdf [file 41467_2025_56610_MOESM1_ESM.pdf]

## Supplementary Information

### Molecular basis for azetidine-2-carboxylic acid biosynthesis

Tim J. Klaubert,<sup>1</sup> Jonas Gellner,<sup>1,2,\*</sup> Charles Bernard,<sup>3,10,\*</sup> Juliana Effert,<sup>4,\*</sup> Carine Lombard,<sup>3</sup> Ville R. I. Kaila,<sup>2</sup> Helge B. Bode,<sup>4,5,6,7,8,9</sup> Yanyan Li,<sup>3,#</sup> Michael Groll<sup>1,#</sup>

<sup>1</sup> Center for Protein Assemblies, Department Bioscience, School of Natural Sciences, Technical University Munich, Garching, Germany.

<sup>2</sup> Department of Biochemistry and Biophysics, Stockholm University, Stockholm, Sweden.

<sup>3</sup> Laboratory Molecules of Communication and Adaptation of Microorganisms (MCAM), UMR 7245 CNRS-MNHN (Muséum National d'Histoire Naturelle), Paris, France.

<sup>4</sup> Max Planck Institute for Terrestrial Microbiology, Department of Natural Products in Organismic Interactions, Marburg, Germany.

<sup>5</sup> Institute of Molecular Biosciences, Goethe University Frankfurt, Frankfurt am Main, Germany.

<sup>6</sup> Myria Biosciences AG, Basel, Switzerland.

<sup>7</sup> Department of Chemistry, Philipps-University Marburg, Marburg, Germany.

<sup>8</sup> LOEWE Centre for Translational Biodiversity Genomics (LOEWE TBG) & Senckenberg Gesellschaft für Naturforschung, Frankfurt am Main, Germany.

<sup>9</sup> Center for Synthetic Microbiology (SYNMIKRO), Phillips University Marburg, Marburg, Germany.

<sup>10</sup> Current address: Institut Pasteur, CNRS UMR3525, Microbial Evolutionary Genomics, Paris, France.

\* Equal contribution

# Correspondence should be addressed to:

[yanyan.li@mnhn.fr](mailto:yanyan.li@mnhn.fr)

[michael.groll@tum.de](mailto:michael.groll@tum.de)

**Supplementary Table S1.** Plasmids used in this work

| Plasmids                           | Genotype <sup>a</sup>                                                                                         | Reference  |
|------------------------------------|---------------------------------------------------------------------------------------------------------------|------------|
| pETDuet_SUMO_Ser_AzeJ <sup>b</sup> | ori ColE1, Amp <sup>R</sup> , <i>P</i> <sub>T7</sub> , <i>azeJ</i>                                            | this study |
| pETDuet_SUMO_VioH                  | ori ColE1, Amp <sup>R</sup> , <i>P</i> <sub>T7</sub> , <i>vioH</i>                                            | this study |
| pCK_0431 pACYC_ara                 | ori p15A, cm <sup>R</sup> , <i>araC</i> , <i>P</i> <sub>BAD</sub> and <i>tacl</i> , I-SceI, I-CeuI            | this study |
| pCK_0433 pCOLA_ara                 | ori ColA, kan <sup>R</sup> , <i>araC</i> , <i>P</i> <sub>BAD</sub> , <i>tacl</i> , I-SceI, I-CeuI, minus BsaI | this study |
| pACYC_pxaA                         | ori p15A, cm <sup>R</sup> , <i>araC</i> - <i>P</i> <sub>BAD</sub> , <i>pxaA</i>                               | this study |
| pACYC_pxaAB                        | ori p15A, cm <sup>R</sup> , <i>araC</i> - <i>P</i> <sub>BAD</sub> , <i>pxaAB</i>                              | this study |
| pCOLA_azeJ                         | ori ColA, kan <sup>R</sup> , <i>araC</i> - <i>P</i> <sub>BAD</sub> , <i>azeJ</i>                              | this study |
| pCOLA_vioH                         | ori ColA, kan <sup>R</sup> , <i>araC</i> - <i>P</i> <sub>BAD</sub> , <i>vioH</i>                              | this study |

a: Amp<sup>R</sup>, ampicillin resistance; cm<sup>R</sup>, chloramphenicol resistance; kan<sup>R</sup>, kanamycin resistance

b: This construct served as the basis for mutagenesis, generating a series of expression plasmids for AzeJ variants.

**Supplementary Table S2.** Primer sequences for *azeJ* mutagenesis with modified positions highlighted in red.

| Mutant | Forward primer (5' → 3')                        | Reverse primer (3' → 5')    |
|--------|-------------------------------------------------|-----------------------------|
| Y18A   | A TCC GCG TTC <b>GCG</b> GAG CTG GAG<br>TTT G   | TC GCG ATG TGT GCC AAT<br>G |
| Y18F   | A TCC GCG TTC <b>TTT</b> GAG CTG GAG<br>T       | TC GCG ATG TGT GCC AAT<br>G |
| M28N   | A CGT ACG ATC <b>AAC</b> ACC CTG GCG<br>AAC     | GG GCC AAA CTC CAG<br>CTC A |
| F134Y  | C CTG TTG CCG <b>TAT</b> AAT CTC CTG<br>GG      | TA CAG TGC GCG ACT<br>TCC G |
| F134H  | C CTG TTG CCG <b>CAT</b> AAT CTC CTG<br>G       | TA CAG TGC GCG ACT TC<br>G  |
| F134L  | C CTG TTG CCG <b>CTG</b> AAT CTC CTG<br>G       | TA CAG TGC GCG ACT<br>TCC G |
| L136N  | G CCG TTC AAT <b>AAC</b> CTG GGA AAC<br>TTT C   | AACAGGTACAGTGCGCGA          |
| R172A  | T ACT CGC GTA <b>GCG</b> CAG TCG TAC<br>TAT C   | GC TTC GGC ACT ATC C        |
| R172K  | T ACT CGC GTA <b>AAA</b> CAG TCG TAC<br>TAT C   | GC TTC GGC ACT ATC C        |
| R172Q  | T ACT CGC GTA <b>CAG</b> CAG TCG TAC<br>TAT C   | GC TTC GGC ACT ATC C        |
| L136D  | G CCG TTC AAT <b>GAT</b> CTG GGA AAC<br>TTT CGG | AA CAG GTA CAG TGC<br>GCG A |
| Y175A  | A CGT CAG TCG <b>GCG</b> TAT CGT CGC<br>TG      | AC GCG AGT AGC TTC          |
| Y175F  | A CGT CAG TCG <b>TTT</b> TAT CGT CGC<br>TG      | AC GCG AGT AGC TTC          |

**Supplementary Table S3.** Primers used for cloning.

| Plasmids    | Oligonucleotides | Sequence (5' →3'; <u>overlapping ends</u> )                            | Template                                                    |
|-------------|------------------|------------------------------------------------------------------------|-------------------------------------------------------------|
| pACYC_pxaA  | JE_G_for3        | <u>GTTTTTTTGGGCTAACAGGAGGAATTCC</u> ATGAAAAC<br>TTCACAATTAGTACCTCTTACC | <i>X. stockiae</i><br>DSM17904<br><br>pCK_0431<br>pACYC_ara |
|             | JE_G_rev5        | <u>GCAGCAGCCTAGGTTAATTAATCAATGGACGGGACA</u><br>TATTTTCTCC              |                                                             |
|             | ck1011<br>ck1008 | TTAATTAACCTAGGCTGCTGCCAC<br>CATGGAATTCCTCCTGTTAGCCCAA                  |                                                             |
| pACYC_pxaAB | JE_G_for3        | <u>GTTTTTTTGGGCTAACAGGAGGAATTCC</u> ATGAAAAC<br>TTCACAATTAGTACCTCTTACC | <i>X. stockiae</i><br>DSM17904<br><br>pCK_0431<br>pACYC_ara |
|             | JE_G_rev6        | <u>GCAGCAGCCTAGGTTAATTAATTATAGGGTCTGGAG</u><br>AGTAAGATCTC             |                                                             |
|             | ck1011<br>ck1008 | TTAATTAACCTAGGCTGCTGCCAC<br>CATGGAATTCCTCCTGTTAGCCCAA                  |                                                             |
| pCOLA_azeJ  | azeJ_for         | <u>TTGGGCTAACAGGAGGAATTCC</u> ATGTCCCAGAACAT<br>GGACCTGAC              | pETDuet_SU<br>MO_Ser_AzeJ<br><br>pCK_0433<br>pCOLA_ara      |
|             | azeJ_rev         | <u>GGTGGCAGCAGCCTAGGTTAATTAATTACGCGGCT</u><br>GAGCTACCAAAG             |                                                             |
|             | ck1011<br>ck1008 | TTAATTAACCTAGGCTGCTGCCAC<br>CATGGAATTCCTCCTGTTAGCCCAA                  |                                                             |
| pCOLA_vioH  | vioH_for         | <u>TTGGGCTAACAGGAGGAATTCC</u> ATGTCCACCCTGG<br>ACTTCTACG               | pETDuet_SU<br>MO_VioH<br><br>pCK_0433<br>pCOLA_ara          |
|             | vioH_rev         | <u>GGTGGCAGCAGCCTAGGTTAATTAATTACGGACGC</u><br>CACGGTTCG                |                                                             |
|             | ck1011<br>ck1008 | TTAATTAACCTAGGCTGCTGCCAC<br>CATGGAATTCCTCCTGTTAGCCCAA                  |                                                             |
| pCK_0431    | ck0922           | TAACTATAACGGTCCTAAGGTAGCGAACCTCAGGCA<br>TTTGAGAAGCACAC                 | pCK_0401                                                    |
|             | ck0953           | AATTACCCTGTTATCCCTACCCAATACGCAAACCGC<br>CTC                            |                                                             |
|             | ck0951           | GTAGGGATAACAGGGTAATTATGACAACCTTGACGGC<br>TACATCATTAC                   | pCK_0401 <sup>1</sup>                                       |
|             | ck0922-rev       | CGCTACCTTAGGACCGTTATAGTTAGCAAAAAACCC<br>CTCAAGACCC                     |                                                             |
| pCK_0433    | ck0952           | CTAGGGATAACAGGGTAATTATGACAACCTTGACGGC<br>TACATCATTAC                   | pCK_0406 <sup>2</sup>                                       |
|             | ck0922rev        | AATTACCCTGTTATCCCTAGTCTAGAGTGATGGTGT<br>CGGGAATC                       |                                                             |
|             | ck0960           | CGGGTCTTGAGGGGTTTTTTGCTAACTATAACGGTC<br>CTAAGGTAGCGAAG                 | pCK_0406                                                    |
|             | ck0955           | AATTACCCTGTTATCCCTAGTCTAGAGTGATGGTGT<br>CGGGAATC                       |                                                             |

**Supplementary Table S4.** Crystallographic data collection and refinement statistics.

|                                                       | AzeJ:SAH                             | AzeJ:MTA:AZE                         | AzeJ:MTA:AZE              | VioH:SAH                            |
|-------------------------------------------------------|--------------------------------------|--------------------------------------|---------------------------|-------------------------------------|
| <b><u>Crystal parameters</u></b>                      |                                      |                                      |                           |                                     |
| Space group                                           | P2 <sub>1</sub> 2 <sub>1</sub> 2     | P2 <sub>1</sub> 2 <sub>1</sub> 2     | P4 <sub>2</sub> 22        | P2 <sub>1</sub> 2 <sub>1</sub> 2    |
| Cell constants                                        | a= 141.5 Å<br>b= 84.2 Å<br>c= 94.3 Å | a= 142.6 Å<br>b= 82.2 Å<br>c= 94.7 Å | a=b= 122.2 Å<br>c= 87.1 Å | a= 60.0 Å<br>b= 77.6 Å<br>c= 84.4 Å |
| Subunits / AU <sup>a</sup>                            | 4                                    | 4                                    | 2                         | 2                                   |
| <b><u>Data collection</u></b>                         |                                      |                                      |                           |                                     |
| Beam line                                             | X06SA, SLS                           | X06SA, SLS                           | X06SA, SLS                | X06SA, SLS                          |
| Wavelength (Å)                                        | 1.0                                  | 1.0                                  | 1.0                       | 1.0                                 |
| Resolution range (Å) <sup>b</sup>                     | 30-3.0 (3.1-3.0)                     | 30-1.95 (2.05-1.95)                  | 30-1.95 (2.05-1.95)       | 30-2.1 (2.2-2.1)                    |
| No. observations                                      | 119,534                              | 357,752                              | 268,774                   | 77,220                              |
| No. unique reflections <sup>c</sup>                   | 21,945                               | 80,170                               | 48,492                    | 21,394                              |
| Redundancy                                            | 5.4                                  | 4.5                                  | 5.5                       | 3.6                                 |
| Completeness (%) <sup>b</sup>                         | 94.3 (97.1)                          | 98.1 (98.7)                          | 99.8 (100)                | 93.5 (92.7)                         |
| R <sub>merge</sub> (%) <sup>b, d</sup>                | 9.3 (66.3)                           | 5.8 (68.8)                           | 6.3 (69.7)                | 9.9 (54.0)                          |
| I/σ (I) <sup>b</sup>                                  | 14.6 (2.7)                           | 16.3 (2.6)                           | 17.1 (2.4)                | 8.2 (2.8)                           |
| <b><u>Refinement (REFMAC5)</u></b>                    |                                      |                                      |                           |                                     |
| Resolution range (Å)                                  | 30-3.0                               | 30-1.95                              | 30-1.95                   | 30-2.1                              |
| No. refl. working set                                 | 20,801                               | 76,143                               | 346,038                   | 20,315                              |
| No. refl. test set                                    | 1,095                                | 4,008                                | 2,423                     | 1,069                               |
| No. non hydrogen atoms                                | 7,226                                | 7,754                                | 3,822                     | 3,836                               |
| No. of ligand atoms                                   | 104                                  | 108                                  | 47                        | 52                                  |
| Solvent molecules                                     | 14                                   | 302                                  | 253                       | 62                                  |
| R <sub>work</sub> /R <sub>free</sub> (%) <sup>c</sup> | 19.3 / 24.2                          | 16.4 / 20.9                          | 14.9 / 19.7               | 19.7 / 24.9                         |
| r.m.s.d. bond (Å) / angle (°) <sup>f</sup>            | 0.001 / 1.1                          | 0.004 / 1.2                          | 0.004 / 1.2               | 0.003 / 1.2                         |
| Average B-factor (Å <sup>2</sup> )                    | 71.0                                 | 37.7                                 | 35.5                      | 24.5                                |
| Ramachandran Plot (%) <sup>g</sup>                    | 97.3 / 2.7 / 0                       | 98.4 / 1.6 / 0                       | 98.4 / 1.6 / 0            | 97.2 / 2.8 / 0                      |
| PDB accession code                                    | 8RYD                                 | 8RYE                                 | 8RYF                      | 8RYG                                |

<sup>[a]</sup> Asymmetric unit

<sup>[b]</sup> The values in parentheses for resolution range, completeness, R<sub>merge</sub> and I/σ (I) correspond to the highest resolution shell

<sup>[c]</sup> Data reduction was carried out with XDS and from a single crystal. Friedel pairs were treated as identical reflections

<sup>[d]</sup>  $R_{\text{merge}}(I) = \frac{\sum_{\text{hkl}} \sum_j |I(\text{hkl})_j - \langle I(\text{hkl}) \rangle|}{\sum_{\text{hkl}} \sum_j I(\text{hkl})_j}$ , where  $I(\text{hkl})_j$  is the  $j^{\text{th}}$  measurement of the intensity of reflection hkl and  $\langle I(\text{hkl}) \rangle$  is the average intensity

<sup>[e]</sup>  $R = \frac{\sum_{\text{hkl}} | |F_{\text{obs}}| - |F_{\text{calc}}| |}{\sum_{\text{hkl}} |F_{\text{obs}}|}$ , where R<sub>free</sub> is calculated without a sigma cut off for a randomly chosen 5% of reflections, which were not used for structure refinement, and R<sub>work</sub> is calculated for the remaining reflections

<sup>[f]</sup> Deviations from ideal bond lengths / angles

<sup>[g]</sup> Number of residues in favored region / allowed region / outlier region

**Supplementary Table S5.** Overview of DFT cluster models. All energies are reported in kcal mol<sup>-1</sup>. Free energy values highlighted in bold correspond to those reported in Fig. 3. Abbreviations introduced here are used throughout the Supplement to identify DFT models.

| System                                      | HCY amine                        | Mutation | Number of Atoms | Total Charge | Abbreviation      | TS <sup>[a]</sup>             |                       | Product <sup>[a]</sup>        |                       |
|---------------------------------------------|----------------------------------|----------|-----------------|--------------|-------------------|-------------------------------|-----------------------|-------------------------------|-----------------------|
|                                             |                                  |          |                 |              |                   | $\Delta E_{el}$               | $\Delta G$            | $\Delta E_{el}$               | $\Delta G$            |
| <b>AzeJ</b><br>( $\epsilon=4$ )             | -NH <sub>2</sub>                 | WT       | 252             | -1           | <i>AzeJ_WT</i>    | 16.4 <sup>[b]</sup><br>(20.7) | <b>16.6</b><br>(20.9) | -2.3 <sup>[c]</sup><br>(-4.1) | <b>-1.2</b><br>(-2.9) |
|                                             |                                  | F134L    | 251             | -1           | <i>AzeJ_F134L</i> | 17.8                          | <b>17.2</b>           | 1.4                           | 2.2                   |
|                                             |                                  | L136D    | 245             | -2           | <i>AzeJ_L136D</i> | 19.3                          | <b>18.8</b>           | 2.7                           | 3.9                   |
|                                             |                                  | Y175F    | 251             | -1           | <i>AzeJ_Y175F</i> | 18.9                          | <b>18.7</b>           | 2.8                           | 3.5                   |
|                                             | -NH <sub>3</sub> <sup>+</sup>    | WT       | 253             | 0            | <i>AzeJ_pWT</i>   | –                             | –                     | 36.7<br>(35.7)                | 35.6<br>(34.6)        |
| <b>Isolated Ligand</b><br>( $\epsilon=4$ )  | -NH <sub>2</sub>                 | –        | 50              | 0            | <i>Lig_Hyd</i>    | 19.3<br>(24.1)                | 21.5<br>(26.3)        | -7.9<br>(-9.2)                | -6.1<br>(-7.4)        |
|                                             | -NH <sub>3</sub> <sup>+[d]</sup> | –        | 51              | +1           | <i>pLig_Hyd</i>   | 30.6<br>(35.5)                | 29.3<br>(34.2)        | 10.9<br>(9.7)                 | 10.3<br>(9.2)         |
| <b>Isolated Ligand</b><br>( $\epsilon=80$ ) | -NH <sub>2</sub>                 | –        | 50              | 0            | <i>Lig_Wat</i>    | 20.8<br>(25.3)                | <b>18.4</b><br>(22.9) | -2.8<br>(-3.9)                | -5.3<br>(-6.5)        |
|                                             | -NH <sub>3</sub> <sup>+[e]</sup> | –        | 51              | +1           | <i>pLig_Wat</i>   | 29.7<br>(32.7)                | 26.8<br>(29.8)        | 14.3<br>(13.3)                | 12.7<br>(11.7)        |
| <b>VioH</b><br>( $\epsilon=4$ )             | -NH <sub>2</sub>                 | WT       | 304             | -1           | <i>VioH_WT</i>    | 26.2<br>(31.1)                | 23.3<br>(28.3)        | -5.4<br>(-7.0)                | -4.4<br>(-6.0)        |

<sup>[a]</sup> Energies were calculated based on optimised geometries and are given relative to the reactant state. Electronic energies ( $E_{el}$ ) were calculated with the B3LYP-D3 (and  $\omega$ B97X-D in brackets) functionals, using the def2-TZVP basis set and COSMO solvation model with dielectric constants given in column 1. Free energies ( $G$ ) include vibrational and entropic corrections, calculated at the B3LYP-D3-RI/def2-SVP level using the COSMO solvation model (Methods).

<sup>[b]</sup> B3LYP-D3/def2-QZVP:  $\Delta E_{el} = 16.7$  kcal mol<sup>-1</sup>

<sup>[c]</sup> B3LYP-D3/def2-QZVP:  $\Delta E_{el} = -2.2$  kcal mol<sup>-1</sup>

<sup>[d]</sup> Geometry optimisation of the reactant state led to spontaneous proton transfer from the HCY amine to the carboxylate. Thus, the -COOH model was considered as reactant state.

<sup>[e]</sup> Energies of the second step in ring formation ( $S_N2$ ) are given relative to the reactant state (-NH<sub>3</sub><sup>+</sup>). The first step, proton transfer to the SAM-carboxylate, has a free energy barrier of  $\Delta G = 1.8$  kcal mol<sup>-1</sup> (both B3LYP-D3 and  $\omega$ B97X-D with def2-TZVP basis set); the resulting intermediate (-COOH) has a free energy of  $\Delta G = -0.4$  kcal mol<sup>-1</sup> (B3LYP-D3/ def2-TZVP) or  $\Delta G = -0.2$  kcal mol<sup>-1</sup> ( $\omega$ B97X-D/ def2-TZVP).

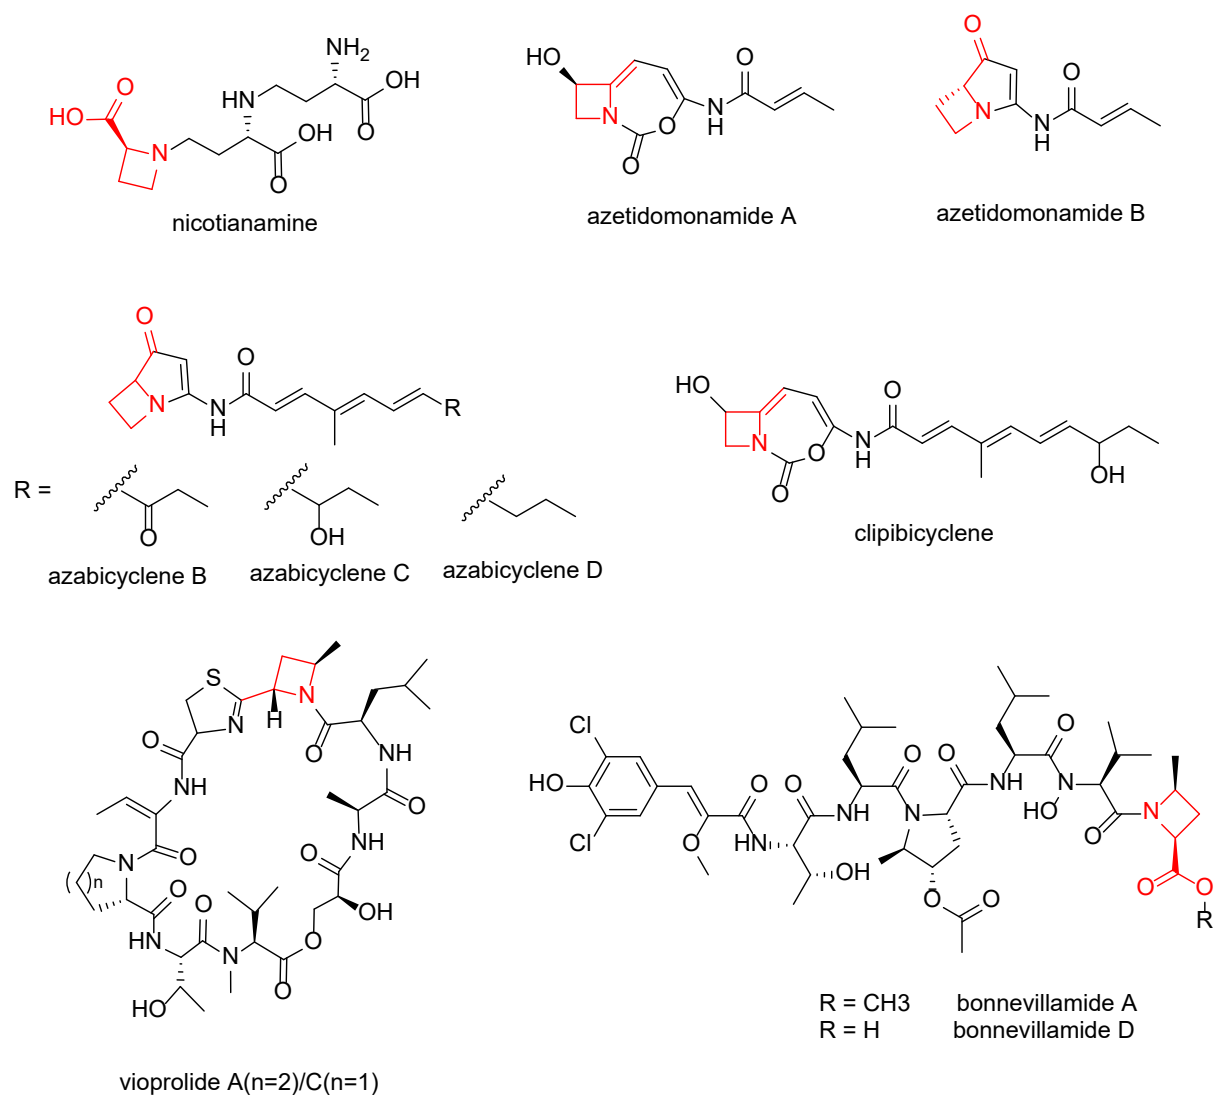

**Fig. S1.** Natural products containing the azetidine-2-carboxylic acid-derived motif (highlighted in red).

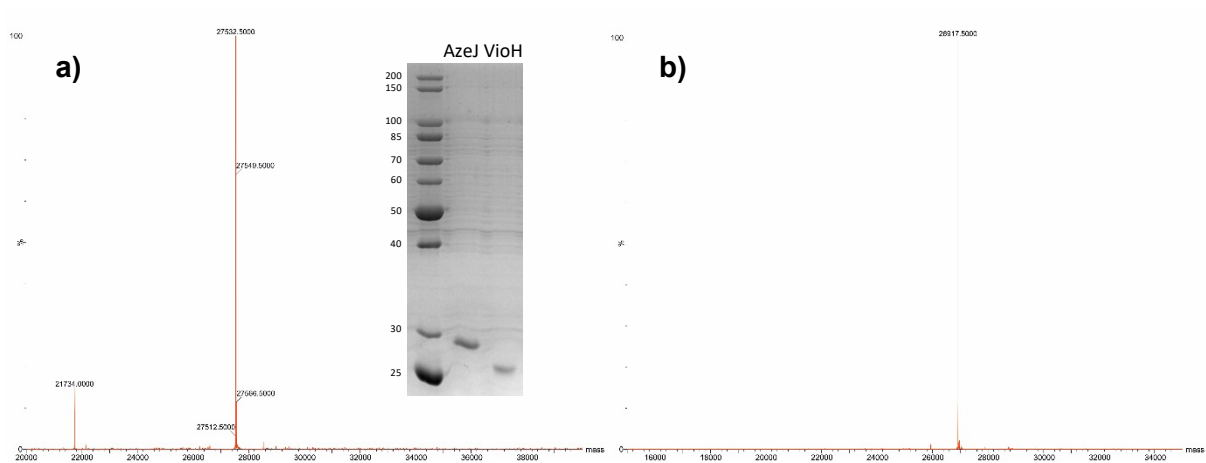

**Fig. S2. ESI-MS analysis of a) AzeJ (27.533 kDa) and b) VioH (26.917 kDa).** Both enzymes were expressed without the start methionine.



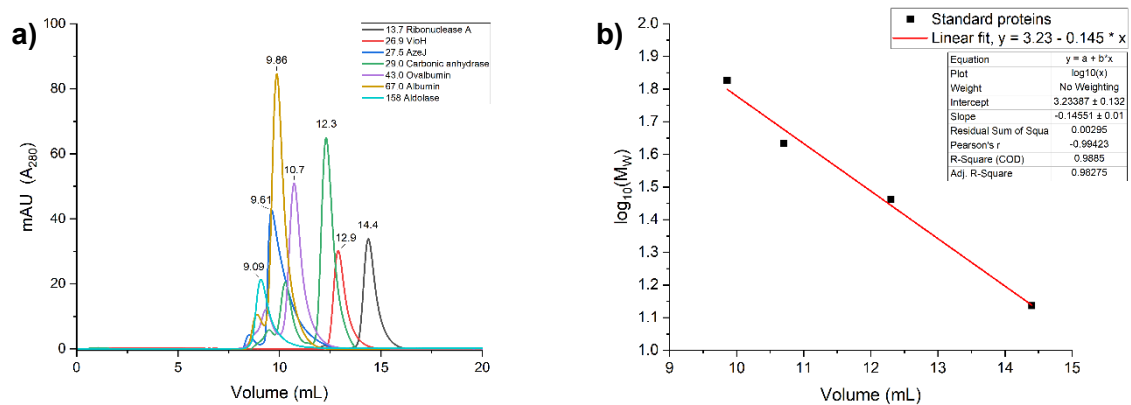

**Fig. S3. AzeJ forms a homodimer and VioH is monomeric** **a)** Superdex 75 Increase 10/300 GL (Cytiva) elution profiles of AzeJ (27.5 kDa, 6.5 mg/mL, blue) and VioH (26.9 kDa, 5 mg/mL, red) compared with marker proteins: ribonuclease A (13.7 kDa, 2 mg/mL, black), carbonic anhydrase (29.0 kDa, 3 mg/mL, green), ovalbumin (43.0 kDa, 6 mg/mL, purple), albumin (67.0 kDa, 7 mg/mL, orange), and aldolase (158 kDa, 5 mg/mL, turquoise). Protein absorbance was measured at 280 nm. **b)** Calibration curve illustrating the correlation between elution volume and molecular mass ( $M_w$ ,  $\log_{10}$ ). The red line represents the linear regression fit derived from marker proteins, illustrating AzeJ as a homodimer and VioH as a monomer.

```

1      10      20      30      40      50      60
AzeJ  MSQNMDLTIGTHRESA FYELEFGPRT IMTLANFPD DVLPLIQMESLMTFEAM AYLRCDAL
VioH  .....MSTLDFYAQGGDR. LIDPARFPA EIKAF LEGER VLLD..SVAEHVELL

70      80      90      100     110
AzeJ  VELGCYDGRA LEIARLLNARYLGVDLDQ RAIETLRTRIERE GMSDRADTVVD.....D
VioH  VEVGSMHGQH LGWAIARGK HYIGVDPVP RYIEQGRTLREQ GLPAERFRF IEGGAELHQ

120     130     140     150     160     170
AzeJ  ILNHTRRGASV GSRALYLL PFNLL GNFREPKRLDSLAERS VAAVVSVFGD SAEATRVRQ
VioH  LLP.RHALAVP PSRCLLFF PFNSF GNMRDPERVLESLSMTG LPF LISSYATTERATQARA

180     190     200     210     220     230
AzeJ  SYYRRCGVQG LELHTRDDGTVFTGS DGFYSRS YSRAC LHAL LAEC GLTVVRSAS..NLFA
VioH  AYYAQCQYEW LESACDERGVRF RAP EGFDAMA YHVEY LEPRMRRY GLEVRPIPFADVGVA

240     250
AzeJ  HCVTVLPEGADQGFGSSAA
VioH  WCAGPMFEPWRP.....

```

**Fig. S4. Sequence alignment of AzeJ and VioH.** Identical residues are highlighted in red boxes and similar ones are shown in red capitals.

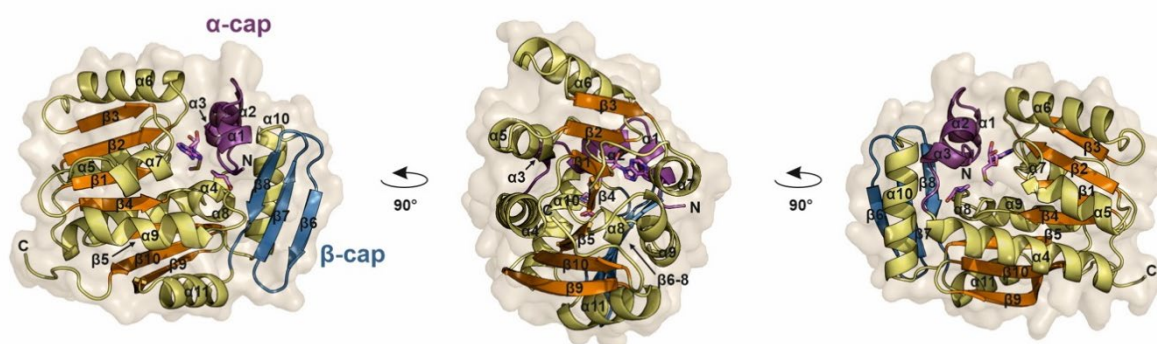

**Fig. S5. Secondary structure elements of AzeJ in complex with MTA and AZE.** The Rossman fold, serving as the nucleotide-binding domain, features a seven-stranded beta sheet ( $\beta 3\uparrow$ ,  $\beta 2\uparrow$ ,  $\beta 1\uparrow$ ,  $\beta 4\uparrow$ ,  $\beta 5\uparrow$ ,  $\beta 10\downarrow$ ,  $\beta 9\uparrow$ , orange) surrounded by helices  $\alpha 4-6$  and  $\alpha 8-9$ , as well as  $\alpha 11$ . The active site, flanked by helices  $\alpha 1-3$  (purple) and strands  $\beta 6-8$  (blue), switches to a closed state upon ligand binding.

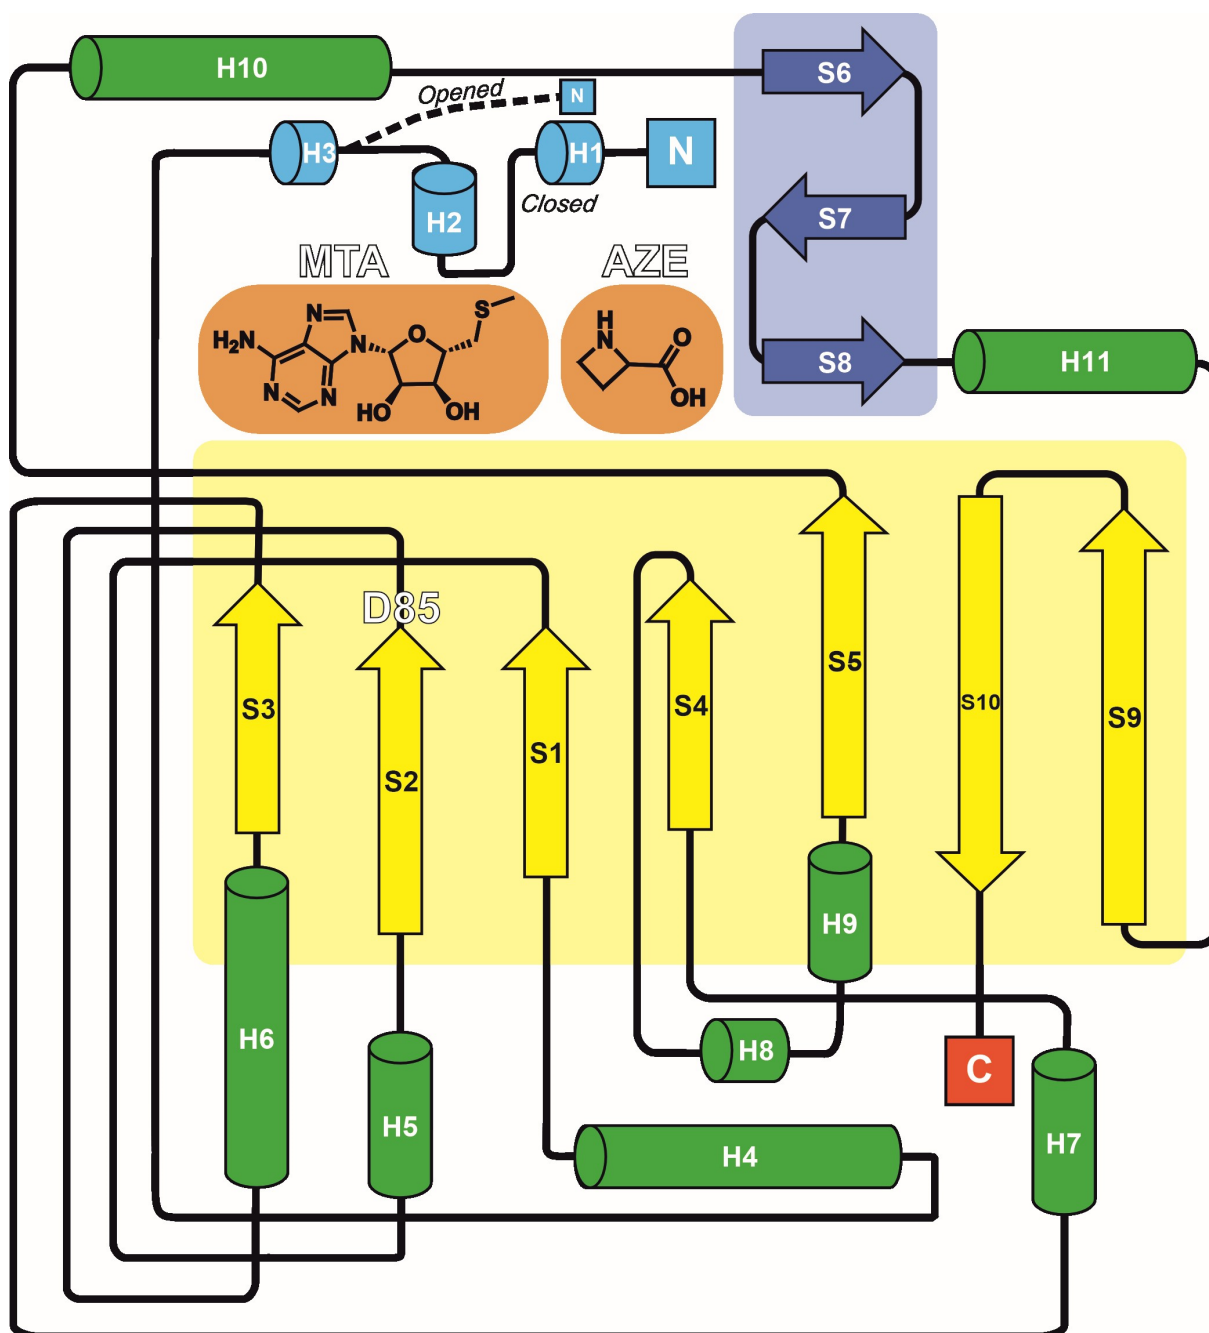

**Fig. S6. Topology of the AzeJ:MTA:AZE complex (PDB ID: 8RYE, chain A).** Beta sheets are shown by arrows (S1-S10) and helices are represented by barrels (H1-H11). The characteristic Rossmann fold (yellow) is flanked by helices H4-H9 and H11 (green). Asp85, positioned at the end of S2, coordinates the ribose group. The active site containing MTA and AZE is enclosed by the N-terminal helices H1 and H3 (light blue) as well as the beta-sheets S6-S8 (dark blue). H1 and H2 might regulate the conformation of AzeJ between the open state (dashed line) and the closed state.

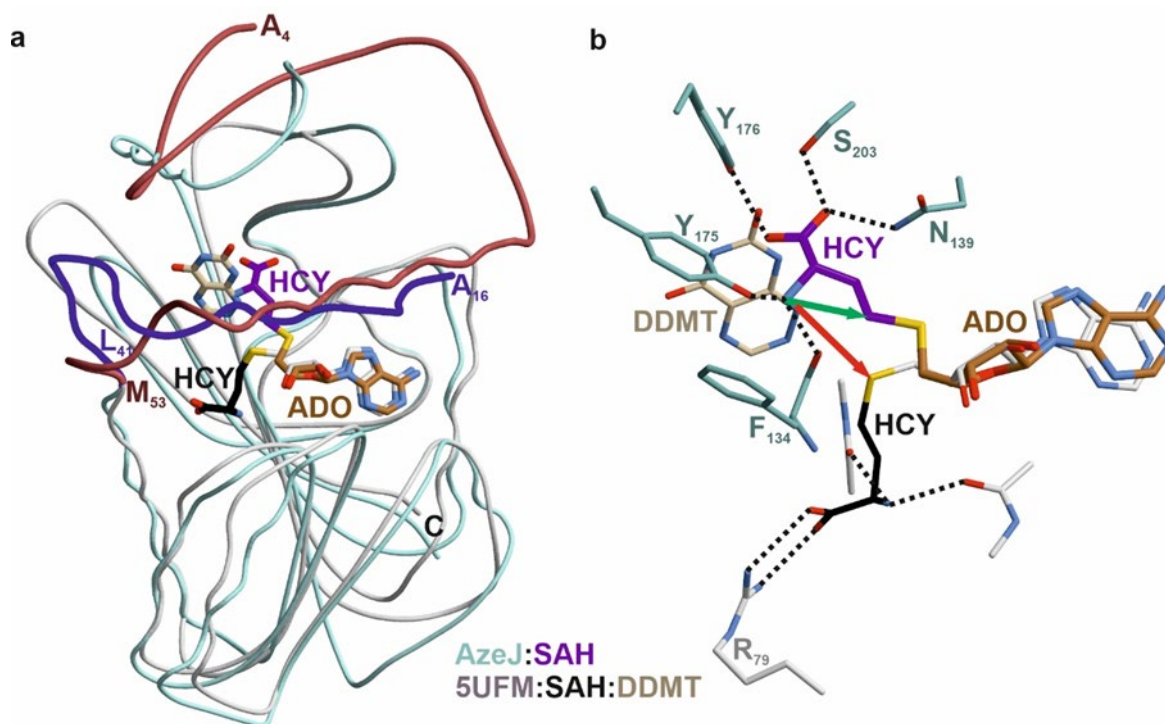

**Fig. S7. Structural comparison of AzeJ (PDB ID: 8RYD) and 1,6-Didesmethyltoxoflavin N-Methyltransferase (PDB ID: 5UFM).** The 5UFM complex, bound to *S*-adenosyl-*L*-homocysteine (SAH; homocysteine (HCY), C-atoms in black; adenosine (ADO), C-atoms in white) and its substrate 1,6-didemethyltoxoflavin (DDMT, C-atoms in tan)<sup>3</sup>, is the best hit in the structural homology search of AzeJ (HCY, C-atoms in purple; ADO, C-atoms in brown). Calculations were performed using the DALI server<sup>4</sup> and resulted in a Z-score of 19.2 (sequence identity = 19%). **a)** Structural superposition of AzeJ and 5UFM in coil representation (rmsd = 1.4 Å, 124 C<sup>α</sup>-atoms; AzeJ in cyan, 5UFM in white; SAH and DDMT shown as sticks). The N-terminus of AzeJ and 5UFM vary significantly (AzeJ, Ala16-Leu41, in blue; 5UFM, Ala4-Met53, in brown). **b)** Active site comparison: Close-up view of AzeJ and 5UFM. The adenosine residue aligns perfectly, whereas the HCY side chains occupy distinct positions. In AzeJ, HCY is oriented similar as the substrate DDMT in 5UFM. Side chain residues coordinating the amine and carboxyl groups of SAH are illustrated (AzeJ, C-atoms in cyan; 5UFM, C-atoms in white), and H-bonds are shown in black dots. Note that AZE-ring formation in AzeJ and methyl transfer in 5UFM take place in the same region. The NH<sub>2</sub> attack on the C<sup>γ</sup> in AzeJ is highlighted by a green arrow; the methyl transfer in 5UFM is shown by a red arrow.

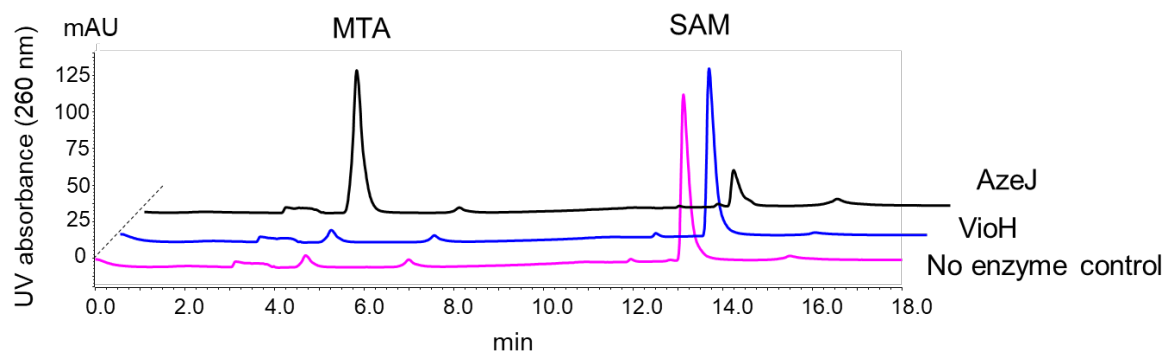

**Fig. S8. *In vitro* activity profiles of AzeJ and VioH.** The HPLC chromatograms were recorded with UV detection at 260 nm. Assays were performed in 50 mM Tris-HCl (pH 7.2) and supplemented with 1 mM SAM, 2 mM TCEP and 3  $\mu$ M enzyme. The incubation time was 1.5 h at 30 °C.

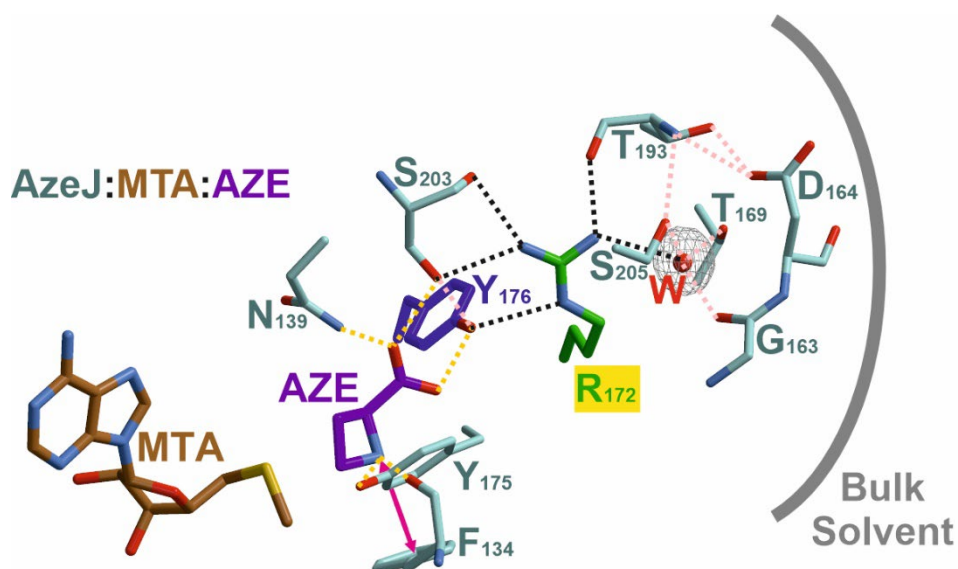

**Fig. S9. Hydrogen bonding network in the AzeJ:MTA:AZE complex supporting SAM deprotonation.** The structure of AzeJ:MTA:AZE (PDB ID 8RYE) reveals an intricate hydrogen bonding network involved in catalysis. The carboxylate of AZE (purple) is stabilized by three hydrogen bonds, while the AZE-NH<sub>2</sub><sup>+</sup> group forms two characteristic H-bonds (shown in gold). The positively charged nitrogen of AZE is additionally stabilized by cation- $\pi$  interactions with Phe134 (double arrow in magenta). Upon binding, the proton of SAM-NH<sub>3</sub><sup>+</sup> would be transferred to Arg172 (green) via Tyr176 (blue). The guanidine side chain of Arg172 forms five distinct H-bonds (highlighted in black), notably with a water molecule (W, red sphere), as defined by the 2F<sub>o</sub>-F<sub>c</sub> electron density map (grey mesh, contoured at 1 $\sigma$ ). This suggests that Arg172 could provide a gating residue central mediating the proton transfer to the bulk solvent. H-bonds  $\leq 3$  Å are illustrated, with H-bonds not further discussed shown in pink.

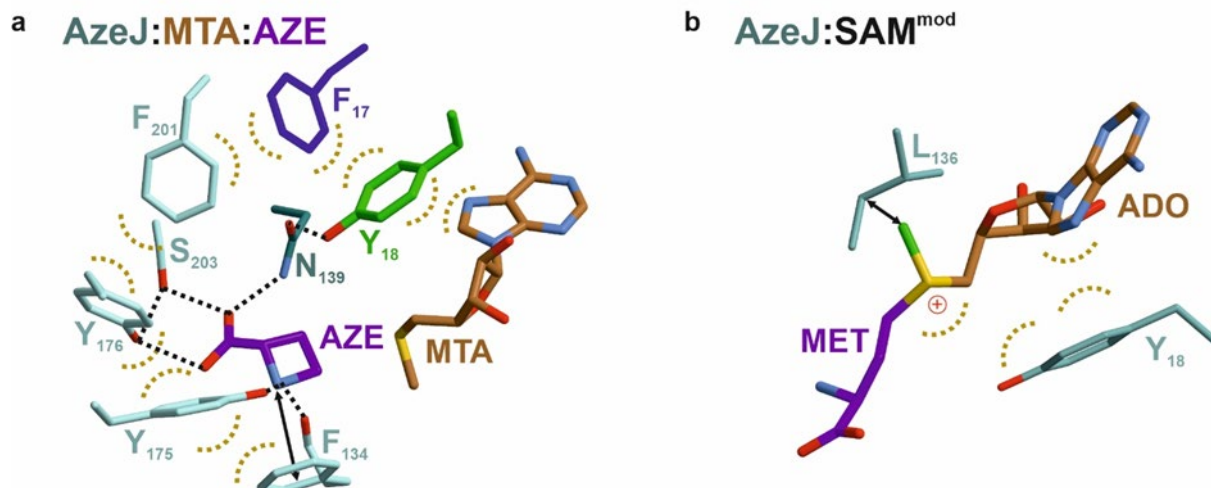

**Fig. S10. Tyr18 in AzeJ: A potential gating residue involved in a precise amino acid interplay at the active centre. a)** The catalytic chamber consists of a network of aromatic amino acids interacting through robust  $\pi$ - $\pi$  interactions (dashed arcs in yellow). Here, the  $\pi$ - $\pi$  stacking between Tyr18 (C-atoms in green) and the upstream Phe17 (C-atoms in blue) is conspicuous, as both residues are unstructured in the open conformation of the AzeJ:MTA complex (PDB ID: 8RYF, chain B). In addition, Tyr18 forms  $\pi$ - $\pi$  interactions with the adenine residue of MTA (C-atoms in brown) and is hydrogen-bonded to the carboxylate group of AZE (C-atoms in purple) via Asn139 (C-atoms in dark cyan). Except for Ser203 and Asn139, all amino acids (C-atoms in cyan) forming H-bonds with AZE are coordinated via  $\pi$ - $\pi$  interactions and form a rigid framework. **b)** In the AzeJ:SAH structure (PDB ID: 8RYD, chain A), the sulfur atom has been extended by a methyl group (green), modelling the positively charged substrate SAM<sup>mod</sup> (composed of adenosine (ADO) and methionine (MET)). While the methyl group is in close van der Waals distance to Leu136 (black arrow), Tyr18 forms strong  $\pi$ - $\pi$  interactions with the adenine residue of ADO and cation- $\pi$  interactions with the sulfonium group of SAM<sup>mod</sup>.



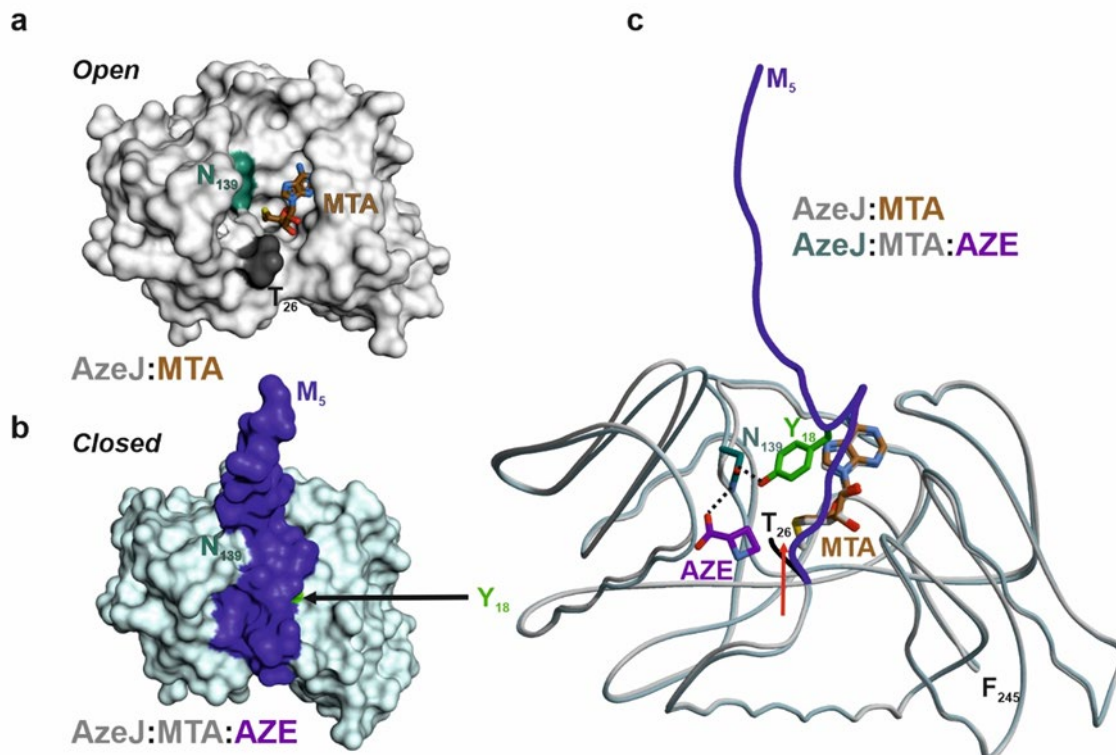

**Fig. S11. Conformational dynamics of AzeJ between open and closed states during catalysis.** The co-crystallisation of AzeJ with its substrate SAM resulted in two datasets with distinct crystal lattices. **a)** In space group  $P4_222$  (PDB ID: 8RYF), chain B shows an accessible active site. Protein residues are depicted as a surface model (white). Asn139 is highlighted in dark cyan and MTA is represented in sticks (C-atoms in brown). The N-terminus starts with Thr26 (C-atoms in black), and the first 25 amino acids of the subunit are disordered (open state). **b)** In space group  $P2_12_12$  (PDB ID: 8RYE), chain A is complexed with MTA and AZE. The N-terminus is well-defined in the electron density map and sequesters the active site from bulk solvents (Met5 - Thr26, blue; Thr26 - Phe245, cyan). Asn139 and Tyr18 (C-atoms in green) are buried in the structure and barely visible (closed state) **c)** The structural overlay of the open and closed subunits depicts perfect alignment ( $\text{rmsd} = 0.5 \text{ \AA}$ , 223  $C^\alpha$ -atoms). In the closed conformation, Tyr18 is coordinated to the carboxylate group of AZE via Asn139 (H-bonds in black dots). The red arrow marks Thr26 between the open and closed conformations.

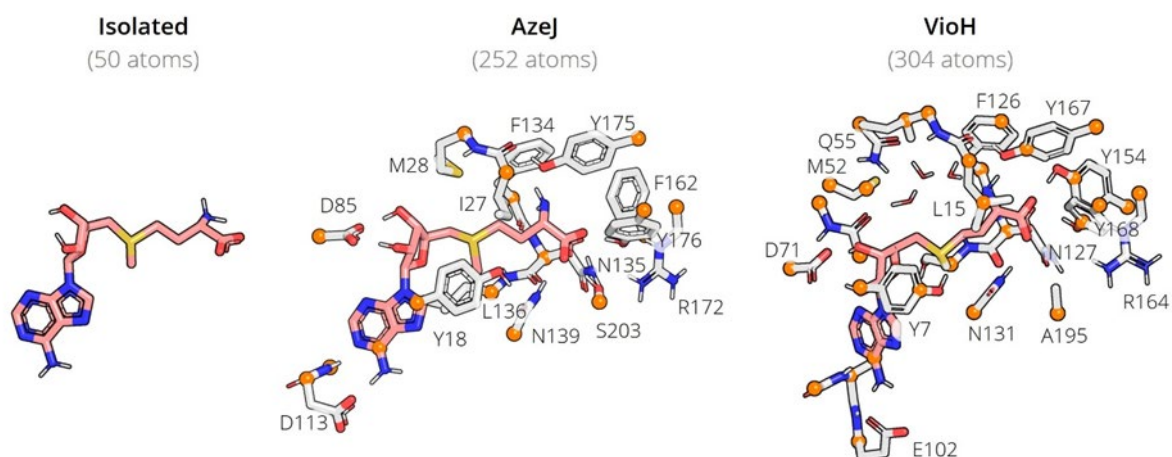

**Fig. S12. DFT cluster models of the active site.** Reactant states of isolated ligand (*Lig\_Wat*), *AzeJ* (*AzeJ\_WT*) and *VioH* (*VioH\_WT*) models after geometry optimisation are shown. SAM is highlighted in pink. Only polar hydrogens are shown. Atoms fixed during geometry and reaction pathway optimisations are marked by orange spheres. Coordinates for reactant and product states of all systems, including the respective fixed atoms, are given in Supplementary Data 1.

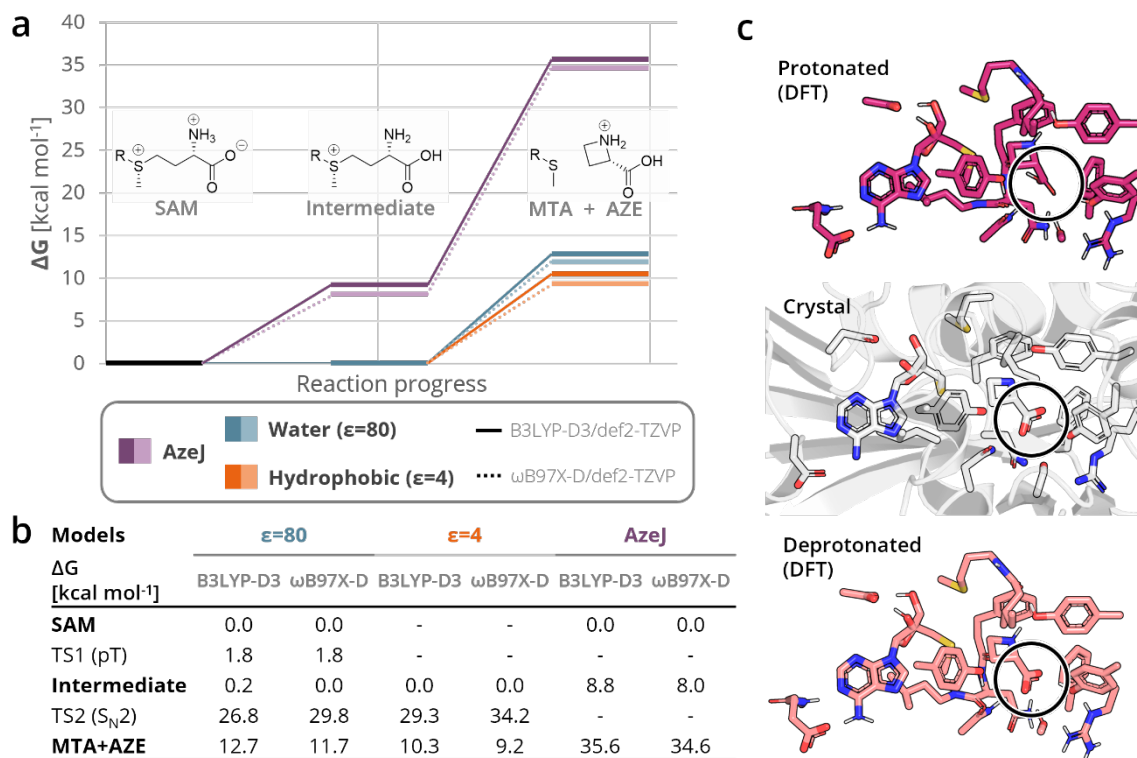

**Fig. S13. DFT calculations exclude the formation of AZE-COOH.** **a)** Free energies of reactant (SAM), intermediate (-COOH) after proton transfer (pT), and products (MTA + AZE; see insets) in *AzeJ* (*AzeJ\_pWT*), water (*pLig\_Wat*), or hydrophobic environment (*pLig\_Hyd*), respectively. DFT calculations were performed at the B3LYP-D3/def2-TZVP and  $\omega$ B97X-D/def2-TZVP level of theory with vibrational and entropic corrections at the B3LYP-D3-RI/def2-SVP level. In the hydrophobic environment, spontaneous pT occurred during geometry optimisation and HCY-COOH thus served as reactant state. **b)** Numerical values corresponding to a). **c)** Optimised product structures, modelled with protonated (*AzeJ\_pWT*) or deprotonated carboxylate (*AzeJ\_WT*), in comparison with the crystal structure (PDB ID: 8RYE).

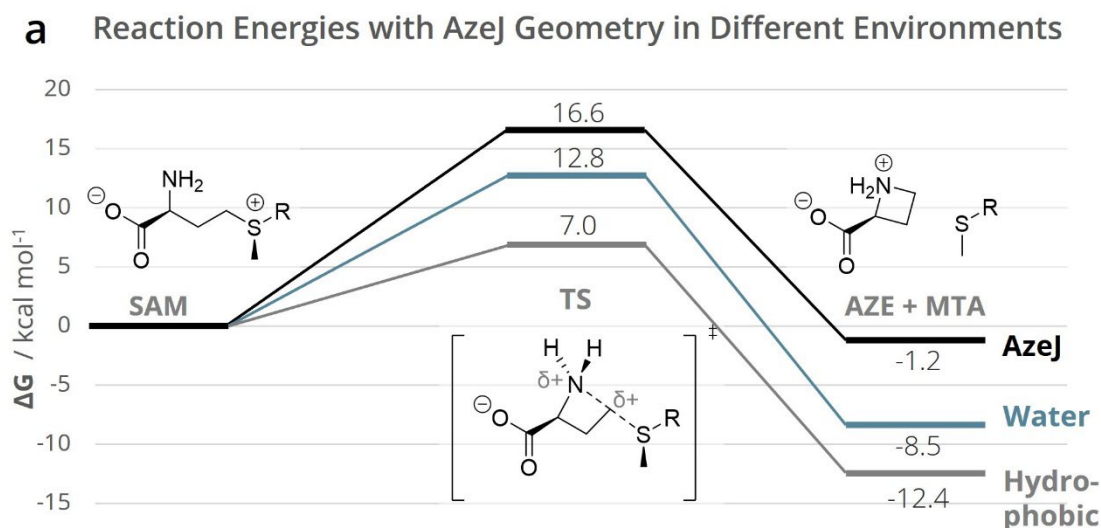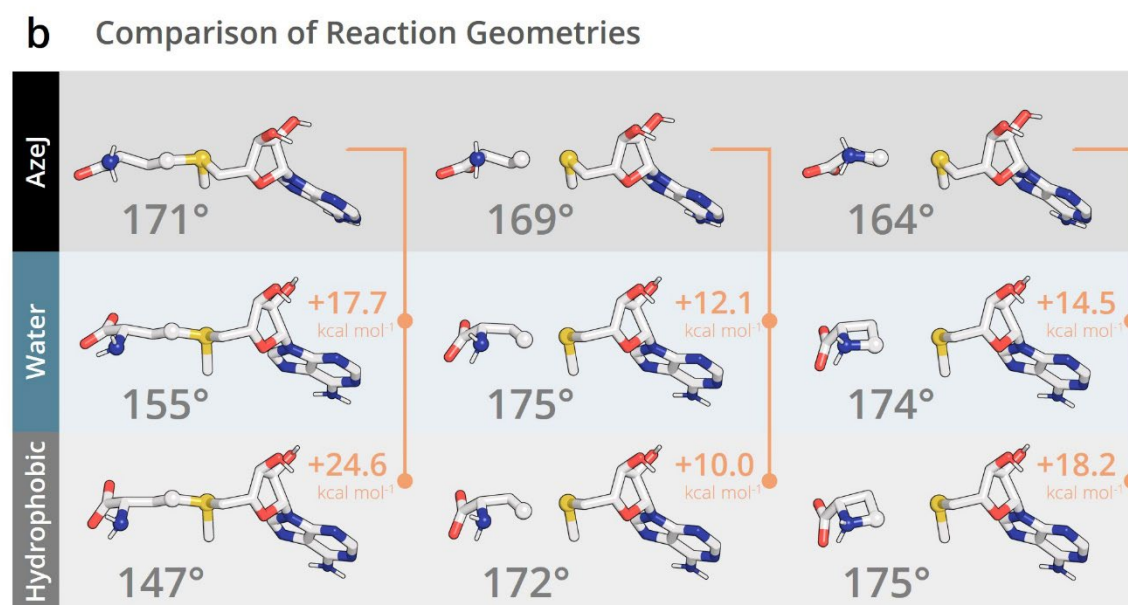

**Fig. S14. Analyses of strain effects in AzeJ.** **a)** Free energies of AzeJ-optimised geometries (b, top row) were calculated in AzeJ (*AzeJ\_WT*), water ( $\epsilon=80$ ), or hydrophobic environment ( $\epsilon=4$ ) at the B3LYP-D3/def2-TZVP level of theory with vibrational and entropic corrections at the B3LYP-D3-RI/def2-SVP level. Energies are given relative to the reactant state. **b)** Geometries of SAM, the transition state (TS), and AzeJ + MTA optimised in different environments (*AzeJ\_WT*, *Lig\_Wat*, *Lig\_Hyd*). Spheres highlight the reacting N-, C<sup>γ</sup>-, and S-atoms, with corresponding angles shown below. Orange values represent strain energies of AzeJ in both media, respectively.

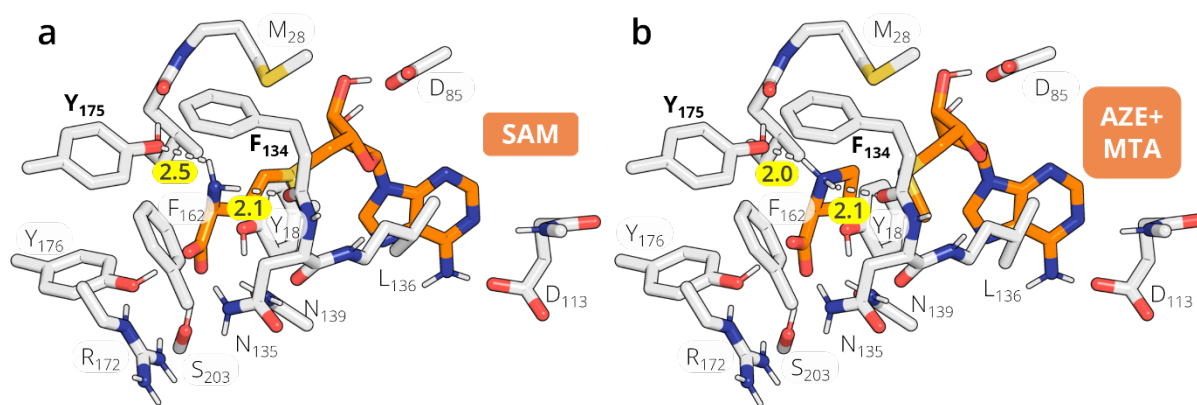

**Fig. S15. Hydrogen-bonding to HCY-amine in DFT-optimised models.** Geometry-optimised *AzeJ*<sub>WT</sub> active-site models of reactant SAM (a) and product AZE+MTA (b). For clarity, only polar hydrogens are shown (distances in Å).

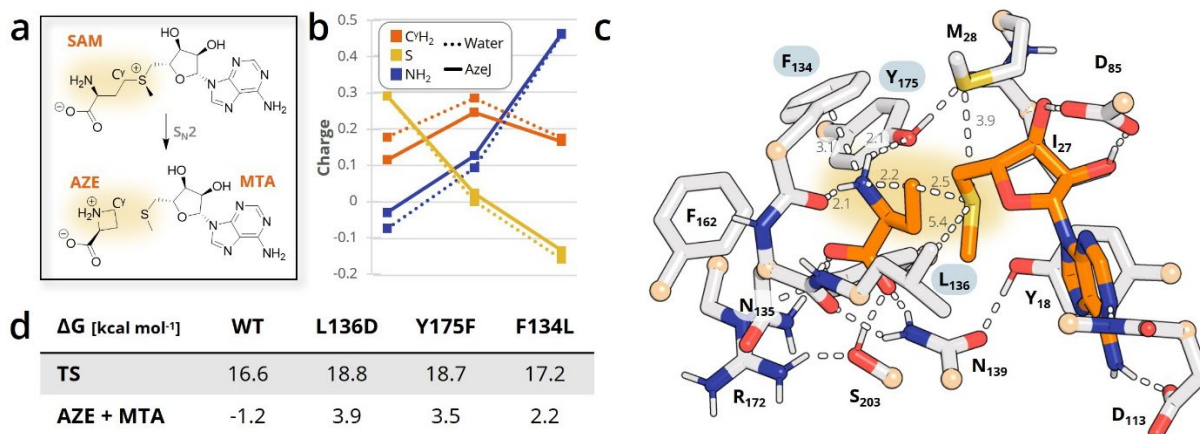

**Fig. S16. Charge transfer and *in silico* mutants.** **a)** Charge transfer from SAM to AZE. **b)** Charge distribution on selected groups involved in the  $S_N2$ -reaction (SAM, transition state (TS), AZE + MTA) in AzeJ and water (*AzeJ\_WT* ligand geometry evaluated in water ( $\epsilon=80$ )). **c)** Alternative view of the AzeJ wild-type (WT) transition state shown in Fig. 3c. Residues highlighted in blue were subjected to *in silico* mutagenesis. Only polar hydrogens are shown for clarity, beige spheres indicate fixed atoms. Distances are given in ångströms. **d)** Free energies of transition states (TS) and products (AZE + MTA) for AzeJ (WT and mutants) were derived from DFT calculations at the B3LYP-D3/def2-TZVP/ $\epsilon=4$  level, with vibrational and entropic corrections at the B3LYP-D3-RI/def2-SVP/ $\epsilon=4$  level, and are given relative to the reactant state.



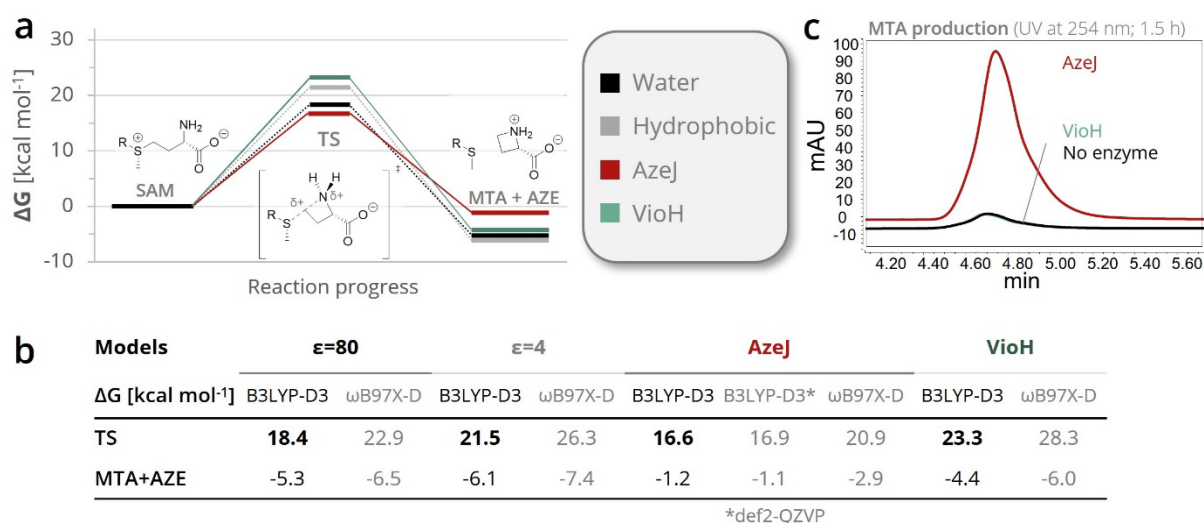

**Fig. S17. Selective catalysis: AzeJ promotes AZE formation in contrast to VioH.** **a)** DFT calculations were performed to model the conversion of SAM to AZE+MTA, either in the enzyme environment (*AzeJ\_WT* or *VioH\_WT*, solid lines) or in solvent (water ( $\epsilon=80$ , *Lig\_Wat*) or hydrophobic medium ( $\epsilon=4$ , *Lig\_Hyd*), dashed lines). Electronic energies were calculated at the B3LYP-D3/def2-TZVP level of theory, with vibrational and entropic corrections at the B3LYP-D3-RI/def2-SVP level. Reactant (SAM), products (MTA + AZE) and transition state (TS) are shown as insets. **b)** Numeric values for free energies shown in a) with additional benchmarking at the  $\omega$ B97X-D/def2-TZVP and B3LYP-D3/def2-QZVP level. Strikingly, the calculated barrier in VioH (23.3 kcal mol<sup>-1</sup>) exceeds that of the uncatalyzed reaction to form AZE in water (18.4 kcal mol<sup>-1</sup>). **c)** Activity tests confirm that MTA is only formed via AzeJ.

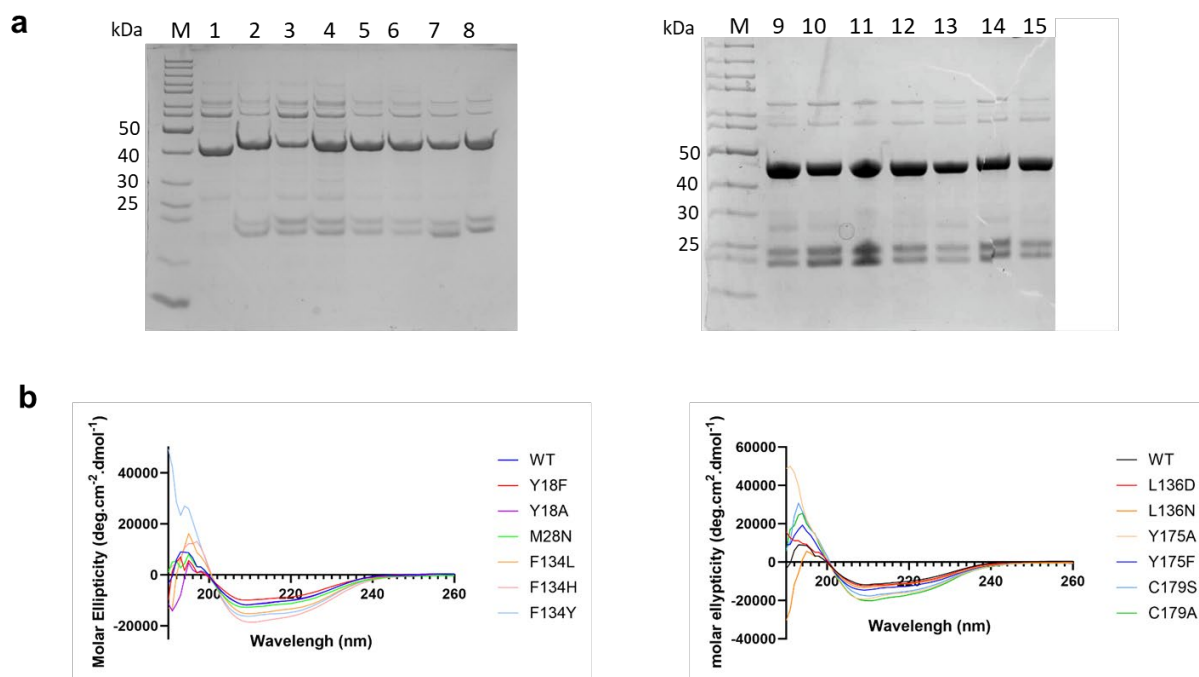

**Fig. S18. Proteins used for activity assays. a)** SDS-PAGE of proteins from small-scale purification. Lane 1-15: VioH, Y18A, L136D, F134L, AzeJ, L136N, Y18F, M28N, F134H, F134Y, Y175F, Y175A, C179A, C179S, AzeJ. **b)** Circular dichroism spectra showing secondary structures of AzeJ and variants. The spectra were recorded with 5  $\mu$ M enzyme in 50 mM Tris-HCl (pH 8.0) by a Jasco J-810 spectropolarimeter. Source Data are provided in the Source Data file.



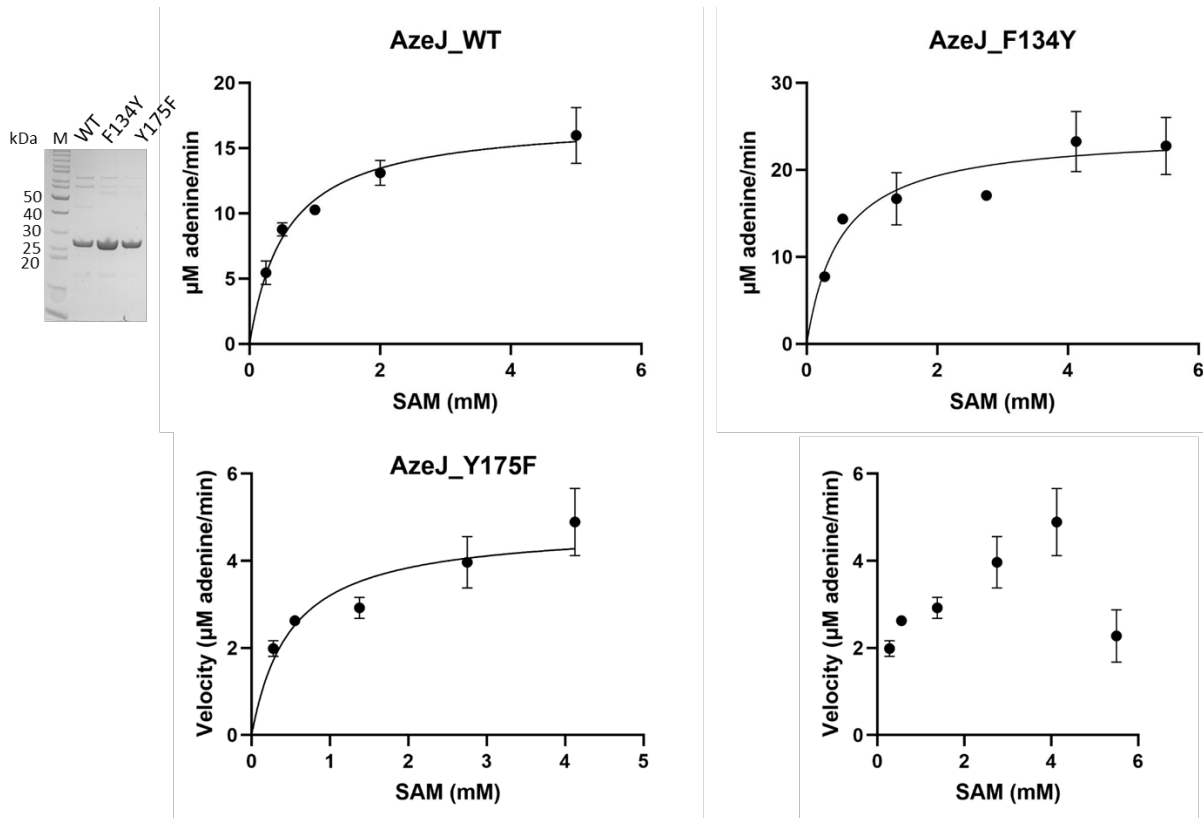

**Fig. S19. Michaelis-Menten curves of AzeJ wild-type, F134Y and Y175F variants.** The plotted data illustrate the velocity of adenine production ( $\mu\text{M}/\text{min}$ ) in relation to the substrate concentration of SAM (mM). The graphs were generated with GraphPad using the Michaelis-Menten model of the non-linear regression analysis function. Each data point was acquired in triplicates; the error bars represent the standard deviation. Curve fitting  $R^2$  values were 0.92 for WT, 0.80 for F134Y and 0.75 for Y175F. To note, Y175F displayed substrate inhibition at higher concentration of SAM, hence curve fitting was performed by omitting the last data point at 5.25 mM SAM. The raw data is shown beside the Y175F kinetic curve. All kinetics measurements were repeated at least twice. Source Data are provided in the Source Data file.

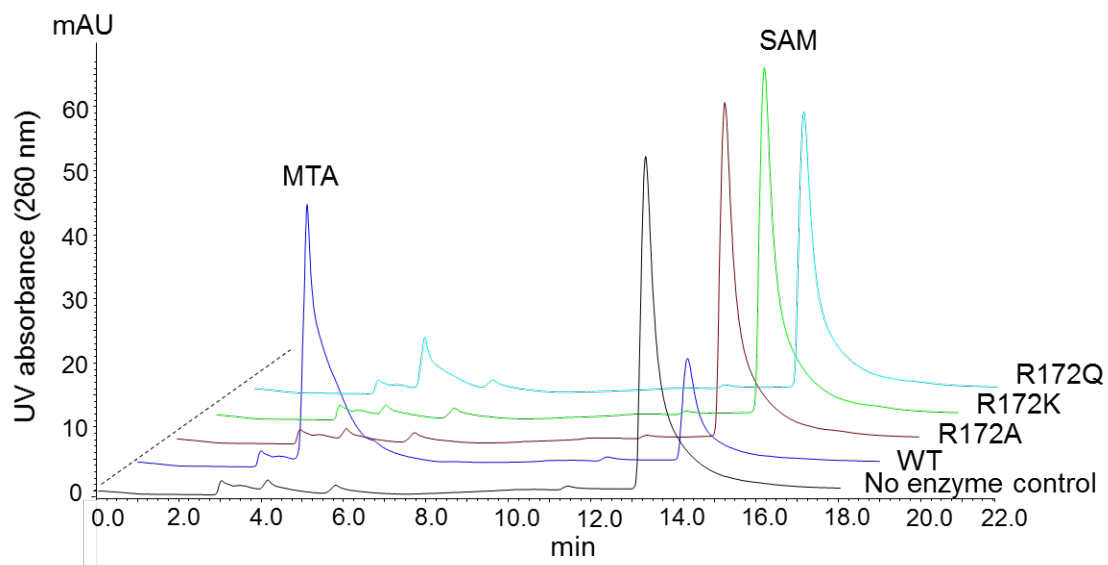

**Fig. S20. Activity of AzeJ Arg172 mutants.** Reactions in vitro were performed as described in the method section. HPLC traces by UV detection at 260 nm are shown.

|                |                                                                   |     |
|----------------|-------------------------------------------------------------------|-----|
| WP_116614598.1 | ENLNGNSP---ISDAPNNDFYAAFEDAVKIMEPGSFSPEVELFLADEKICLTKLFH--VE      | 81  |
| MDF3054353.1   | SILQKAGFVKEYTNKTSYEFYKS-QGKELLV-QENYPLLIIKEYLQYESQQVSKIIITA-HQ    | 124 |
| CCG86095.1*    | -YMTQDMDIGRSMNQDTPVFYQQDSGAKS IMTLANFPDDMLP LLOMENIATYEAMG--HF    | 60  |
| VTQ03862.1     | -EVSQNMDLTIGT-HRESAFYELFEGPRTIMTLANFPDDVLP LLOMESLMTFEAMA--YL     | 75  |
| AzeJ           | --MSQNMDLTIGT-HRESAFYELFEGPRTIMTLANFPDDVLP LLOMESLMTFEAMA--YL     | 55  |
| GFJ87888.1     | -PDRGGS PVAVSTQQRVASFFD--TAWRRRIIA--TQPASVRVHLAAERRLT----ESVLP    | 152 |
| MBX9695614.1*  | --VKR----ANLRLHEIGQFYGERKGRWRFDSH-PLTPELKNYLSAEAEFLGTVMQD--G      | 70  |
| MCC6746182.1   | --VPTGEVVTWCFDKEVAQFYGEEGGARMFDDV-RNTPEVENYLNNEAVALDRLFRAL-P      | 70  |
| VioH           | -----MSTLDFYAQGGDRLIDPA-RFPAEIKAFLEGERVLL----DSVAE                | 41  |
| MBP2169418.1   | -----MVNKNKNAVTVETFCYCSGWRMFVDS-RLTSAVNAYLCAEKAI IANLLQQPEA       | 52  |
| WAT00603.1     | -----MTNDENRCTDRVETFFYGGHNGWRMFDR-MLTPEVAAYLVEKRLVAEYLEEAGE       | 54  |
| KAB7894704.1   | -----MLVCDIEAEDNVAKFYGGQNGWRMFDR-ILTAEVAAFLVEESRC IANYLENSAN      | 54  |
| EIC83926.1     | -----MLTYDVAADRVMFYGGQNGWRMFDR-MLTPEVTAYLNEEKRQIAGYLENSAS         | 54  |
|                | * : : * *                                                         |     |
| WP_116614598.1 | QYDCIIEVGCHSGRN-AGWSSSLCHRYIGIDINESAIRSAKNAHASNARIE--FVCG---      | 135 |
| MDF3054353.1   | SYTALLEVACADARN-MDIALKNNLKYGIDFIRENIDKAEKRIKALNQI STAFVECASI      | 183 |
| CCG86095.1*    | RCNTLVELGICYDGRA-LEIARLLNARYQGIDLNPRAIKVLRERVKQEE-----IED         | 110 |
| VTQ03862.1     | RCDALVELGICYDGRA-LEIARLLNARYLGVDDLQRAIETLRTRI EREG-----MSD        | 125 |
| AzeJ           | RCDALVELGICYDGRA-LEIARLLNARYLGVDDLQRAIETLRTRI EREG-----MSD        | 105 |
| GFJ87888.1     | AYRAMVEVGCADGSLLLPVARRCALDYLGLDLAAGAVAA TRAAGADA-----             | 199 |
| MBX9695614.1*  | SYKTLIEVGCYGRY-LDWALSRGYHYVGM DIVQWLVDLQVVRTARAKKFP HSLSCGVIR     | 129 |
| MCC6746182.1   | DRNHLEIEVCGHGGRY-RPWAAERDLNYPDGLDLVAALVDAGRKLHVPTR---PDLRSKLHI    | 126 |
| VioH           | HVELLVEVGS MHGQH-LGWAIARGKHYIGVDPVPRYIEQGRRTLREQG-LPAERFRFI-E     | 98  |
| MBP2169418.1   | QIDFIEVGCYGRY-LPLLSAQININCYGIDLVSWLVALGKIRLPL YQ-AHSAGQARIEV      | 110 |
| WAT00603.1     | ALEQFIEVGCYGRY-LHVALKHGVS YRGIELVGWLAALGKARVTACP-LPPNCSAQIEH      | 112 |
| KAB7894704.1   | TLNQFVEIGCYGRY-LHVALKHKVS YRGVELVQWLAE L GKARINACP-LPKNCSAQIEH    | 112 |
| EIC83926.1     | GLSQFVEIGCYGRY-LHVALKYRVN YRGVELVRWLAE L GKARIAACQ-LPENCSAQIEH    | 112 |
|                | ::*:. . * *:: .                                                   |     |
| WP_116614598.1 | -PVEHVIS--SIL--DENLCKRRIIVLFPFNFLFGNFVNDELIS SFSLTGADLAMSNFNT     | 190 |
| MDF3054353.1   | FDLSEKK-----DFIPETEKVLTFPFNALGNMGSII SVLKIVLNLN YDIVFSFKT         | 235 |
| CCG86095.1*    | RVDTIVGDVLT HMSRQQLSVGSQTL YLLP FNFLGNFRDPLPL LK LAKLDV ISVICVFSN | 170 |
| VTQ03862.1     | RADTVDDILNHTRRG-ASVGSRALYLLP FNFLGNFRFPKRL L D S LAERSVAAVSVFGD   | 184 |
| AzeJ           | RADTVDDILNHTRRG-ASVGSRALYLLP FNFLGNFRFPKRL L D S LAERSVAAVSVFGD   | 164 |
| GFJ87888.1     | ----VRADVLELT--GLALPAGPLLVAF PFNVFGNLPEPERALG AVAASGADALVLT YDT   | 253 |
| MBX9695614.1*  | HPAEEIDRAVREL--SLDHPEQKALVFP FNCFMGNVAQFDTV VDSLGRSNL DLVSTFKT    | 187 |
| MCC6746182.1   | ESVEELGRLEFEHE--GLQGHGNR VITLFP FNCFGNLARP SMVLRALAH TQASALVSTYST | 184 |
| VioH           | GGAEELHQLLPRH--ALAVPPSRCLLFP FNSFGNMRDPERVLESL SMTGLPFLISSYAT     | 156 |
| MBP2169418.1   | CSVDKVRDLLIAS--DQDKTKKFC-IFFP FNCFGNLPYPRQVLAHL SGLNVTMIISGFLP    | 167 |
| WAT00603.1     | LSAEHLHCVLPDS--DIDIAGKSC-LFFP FNCFGNLRDPLRV LAELKGRNTEV IISGFAS   | 169 |
| KAB7894704.1   | LSAEHLHCLFPNP--TQSAKSC-VFFP FNCFGNLSPLRV L GELKGRNTEV IISGFSC     | 169 |
| EIC83926.1     | LSADHLHCVLPYS--EHDISSKSC-VFFP FNCFGNLS DPLRV L SELKGRNTEV IISGFSS | 169 |
|                | :***: ** . . :                                                    |     |
| WP_116614598.1 | RSATTLGRYNYYSNCFPRSQIRVYDAEQVLFKAGNHF-RSIA YDANYLRKLI RDRSNYH     | 249 |
| MDF3054353.1   | TDEANRTRFEY YQNCGY-SNLKCYDDGNGI IFTSSEGL-KSIA YFEHYLKT L FETLNCRV | 293 |
| CCG86095.1*    | SPEAIRVRHDY YLRGCV-QALELHSHEDGTLFTGADGF-YRSYTRSS FHSLLTRCGLSV     | 228 |
| VTQ03862.1     | SAEATRVRSY YRRCGG-AGPGVAHAGRRHRVHRQRRLL LALVFTR-----LPPRPARR      | 237 |
| AzeJ           | SAEATRVRSY YRRCGV-QGLELHTRDDGT VFTGSDGF-YRSYSRACLHALLAECCGLTV     | 222 |
| GFJ87888.1     | SAGAAAVRSEY YRACGL-AGELVAD-GTGVHFTA-APF-TSSVYHRAVLTGWL AGHYRV     | 309 |
| MBX9695614.1*  | DATSTKFRKEY YGKCGY-EQLNSRILKQGLL IISEEGF-HAMAYHQDV LVNSFFKRGFDL   | 245 |
| MCC6746182.1   | DPETNLRIT YYEQCHY-SGLVAQDLPGV VIRSREGL-RAYAYREY LTRLFAAVNYRL      | 242 |
| VioH           | TERATQARAAY YACQY-EWLESACDERGVR FRAPEGF-DAMAYHVEY LPRMRYGLEV      | 214 |
| MBP2169418.1   | DARTSDBLRQDY YAKGC-QHLQVSPGEQGT LITSADGL-NSLAYHPESLQQLAEFGFSL     | 225 |
| WAT00603.1     | NEQATLARMAY YQCGC-TDLRCRVTERGVEISSREFL-QSLAYDAENLE ILLNEFGFRL     | 227 |
| KAB7894704.1   | SDKATQARIAY YARCGC-TGLSSRLRDTGVEISSDES L-QSLAYQPEKLEMLLNEFGFRL    | 227 |
| EIC83926.1     | SEQTTSARMAY YAKGC-TDLSSQHTERG VQISSSEFL-ESLAYQSGALELL LNEFGFRL    | 227 |
|                | : * * * * :                                                       |     |

**Fig. S21. Proposed sequence signatures of AZE synthases.** Multiple sequence alignment of AzeJ, its 10 closest homologs, and VioH by Clustal Omega.<sup>5</sup> For clarity, the central portion of the alignment is shown. Sequence signature blocks are highlighted in yellow. Homologous protein sequences are WP\_116614598.1 (*Paraburkholderia unamae*), MDF3054353.1 ( $\gamma$ -Proteobacteria from soil metagenome), CCG86095.1 (*Erwinia piriflorinigrans*), VTQ03862.1 (*Pseudomonas aeruginosa*), GFJ87888.1 (*Phytoh abitans rumicis*), MBX9695614.1 (Cyanobacteria bacterium from water metagenome), MCC6746182.1 ( $\Delta$ -Proteobacteria from water metagenome), MBP2169418.1 (*Erwinia toletana*), WAT00603.1 (*Rouxiella chamberiensis*), KAB7894704.1 (*Rouxiella* sp.), EIC83926.1 (*Serratia* sp.). The sequences of CCG86095.1 and MBX9695614.1 were manually inspected and re-annotated to include additional residues at the N-terminus.

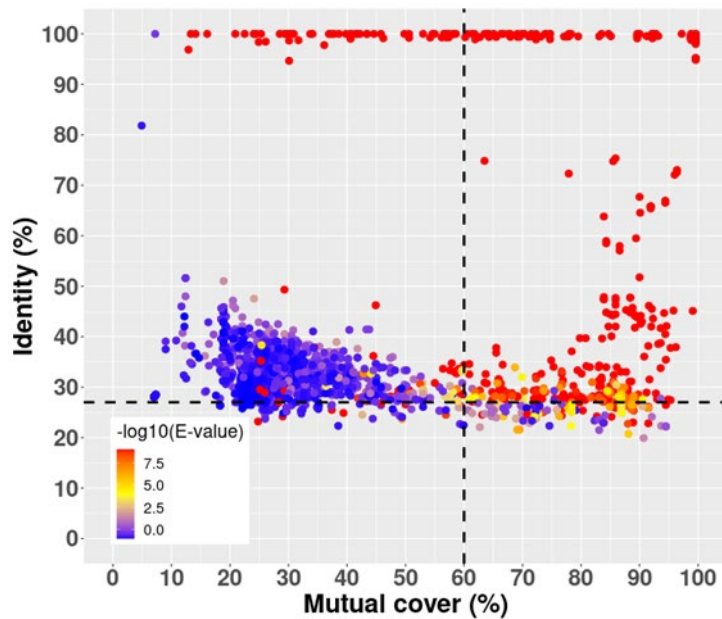

**Fig. S22. Distribution of sequence identity and mutual coverage with AzeJ/VioH of non-redundant hits.** On the scatterplot, each dot corresponds to the alignment of a hit in the NCBI non-redundant protein sequence database with either VioH or AzeJ. The y axis gives the percentage of amino acid sequence identity of the target sequence with the query, whereas the x axis gives the minimum between the percentage of the query length and of the target length being covered by the alignment. The color of a dot corresponds to the  $-\log_{10}$  of the E-value of the alignment, with red values corresponding to the most significant hits. The dashed lines represent the identity and mutual coverage cutoffs used to filter the hits. The cutoffs were defined as such to maximise the amount of reliable hits and to minimise the amount of spurious hits among the pool of retained sequences.

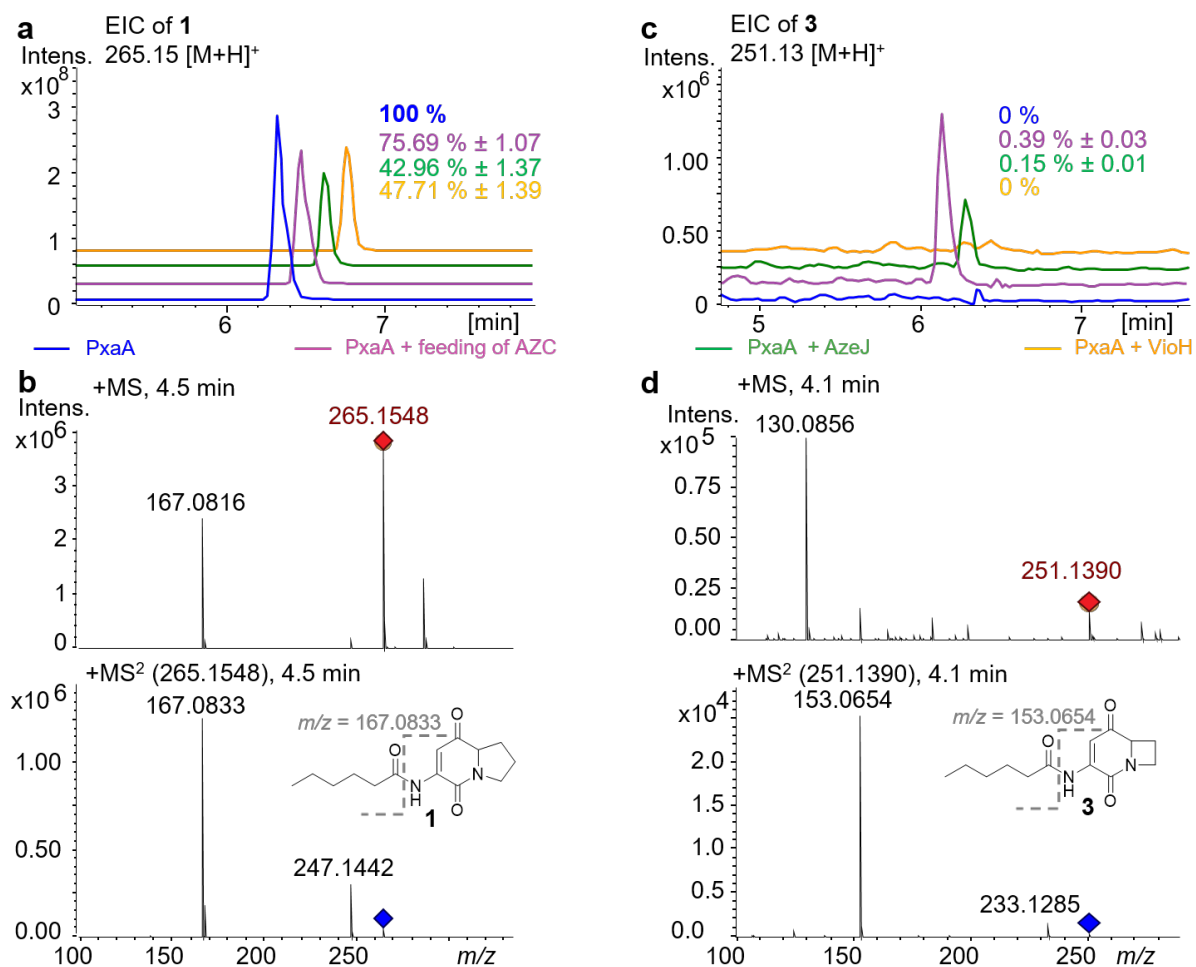

**Fig. S23. Production of AZE-incorporated pyrrolizixenamides.** Extracted ion chromatograms (EICs) of indicated compounds under various conditions: Expression of *pxaA* in *E. coli* (blue), feeding AZE to a *pxaA*-expressing *E. coli* strain (pink), co-expression of *pxaA* and *azeJ* (green), as well as co-expression of *pxaA* and *vioH* (yellow) in *E. coli*. **a**) EIC of  $m/z$  265.15  $[M+H]^+$  used for relative quantification and **b**) LC-HRMS/MS analysis of **1** ( $m/z$  calc'd for  $C_{14}H_{20}N_2O_3 [M+H]^+ = 265.1546$ ; obs'd.  $m/z = 265.1548$ ;  $\Delta$  ppm = 0.3). Inset: proposed structure of **1** indicating the key MS<sup>2</sup> fragment ( $m/z$  calc'd for  $C_8H_{10}N_2O_2 [M+H]^+ = 167.0815$ ). **c**) EIC of  $m/z$  251.13  $[M+H]^+$  used for relative quantification and **d**) LC-HRMS/MS analysis of **3** ( $m/z$  calc'd for  $C_{13}H_{18}N_2O_3 [M+H]^+ = 251.1390$ ; obs'd.  $m/z = 251.1390$ ;  $\Delta$  ppm = 0). Inset: proposed structure of **3** indicating the key MS<sup>2</sup> fragment ( $m/z$  calc'd for  $C_7H_8N_2O_2 [M+H]^+ = 153.0658$ ). Relative quantification of peptides was performed by setting the production of **1** by the wild-type PxaA to 100 % (see panel a). Relative quantities of **1** and **3** are given with standard deviations.

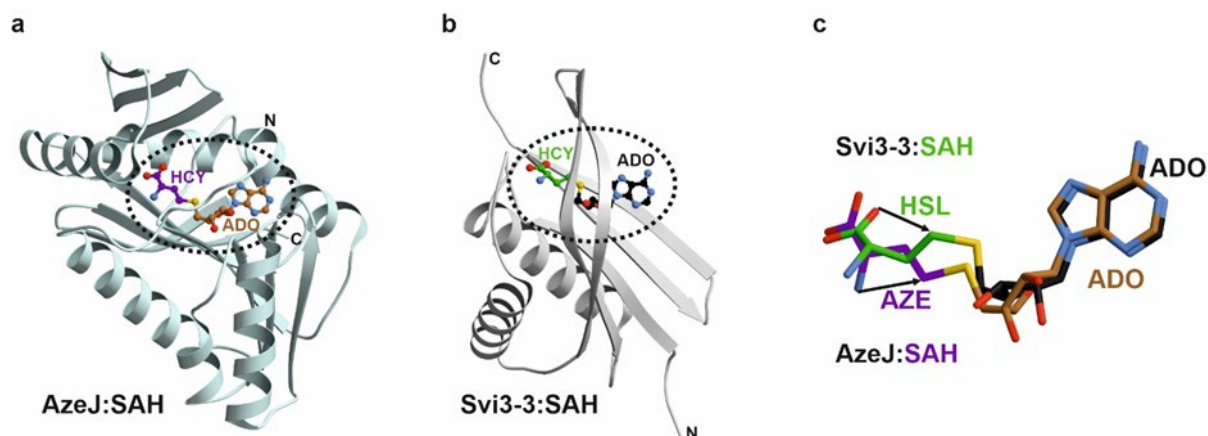

**Fig. S24. Methionine residue arrangement in SAM determines cyclisation reaction.** While Svi3-3 was shown to catalyse the cleavage of SAM into MTA and *L*-homoserine lactone (HSL),<sup>6</sup> AzeJ forms MTA and AZE. **a), b)** Coiled representations of AzeJ (PDB ID: 8RYD, C-atoms in cyan) and Svi3-3 (PDB ID: 6ZMG, C-atoms in white) in complex with SAH. Due to distinct protein folding, the structures were aligned via the adenine residue of SAH. **c)** Molecular insights into the catalytic centres of each lyase illustrate characteristic arrangements of the homocysteine residue (HCY). In 6ZMG, the carboxylate group of HCY (C-atoms in green) is positioned for nucleophilic attack on the C $\gamma$ -atom (distance 3.4 Å) to form MTA and HSL. In contrast, the free amine group of the HCY residue in AzeJ (C-atoms in purple) is perfectly aligned to form MTA and AZE (distance 2.9 Å). These distinctive conformations prevent side reactions and allow the enzymes to selectively cleave SAM to either HSL or AZE (indicated by the black arrow).

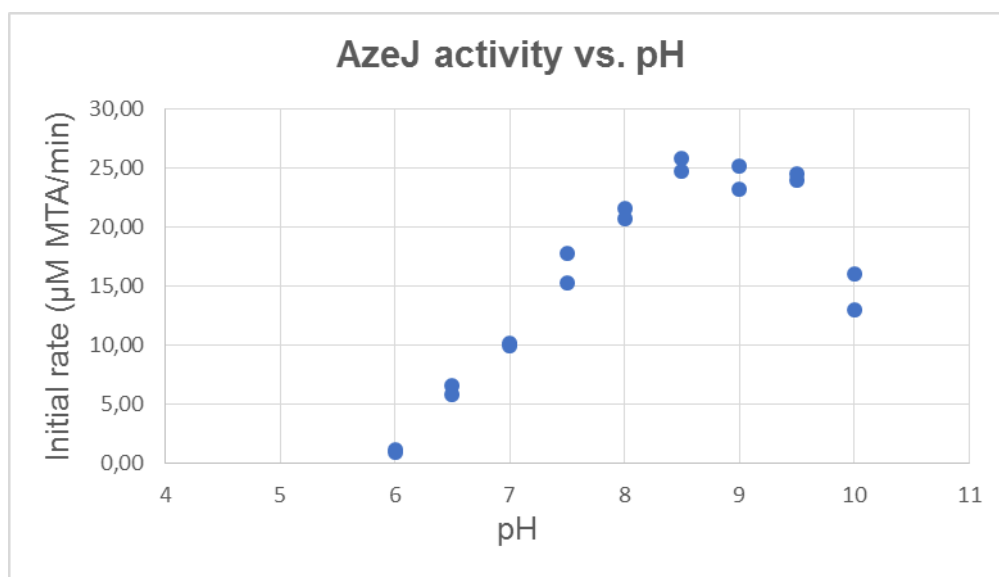

**Fig. S25. AzeJ activity vs. pH.** Activity assays were performed with 1 µM AzeJ and 1 mM SAM at 30 °C for 9 mins. Produced MTA was analysed and quantified by HPLC. Each measurement was acquired in duplicates and all data points were plotted. Source Data are provided in the Source Data file.

## REFERENCES

1. Kegler, C. & Bode, H. B. Artificial splitting of a non-ribosomal peptide synthetase by inserting natural docking domains. *Angew. Chem. Int. Ed.* **59**, 13463–13467 (2020).
2. Bozhüyük, K. A. J. *et al.* Evolution inspired engineering of megasynthetases. *Science* **383**, eadg4320 (2024).
3. Fenwick, M. K., Almabruk, K. H., Ealick, S. E., Begley, T. P. & Philmus, B. Biochemical characterization and structural basis of reactivity and regioselectivity differences between *Burkholderia thailandensis* and *Burkholderia glumae* 1,6-didesmethyltoxoflavin *N* - methyltransferase. *Biochemistry* **56**, 3934–3944 (2017).
4. Holm, L. & Rosenström, P. Dali server: conservation mapping in 3D. *Nucleic Acids Res.* **38**, W545–W549 (2010).
5. Sievers, F. *et al.* Fast, scalable generation of high-quality protein multiple sequence alignments using Clustal Omega. *Mol. Syst. Biol.* **7**, 539 (2011).
6. Guo, X. *et al.* Structure and mechanism of a phage-encoded SAM lyase revises catalytic function of enzyme family. *eLife* **10**, e61818 (2021).
