# Supplementary material for: Molecular basis for azetidine-2-carboxylic acid biosynthesis
Source: PubMed Central journal article supplement (PMC11794875; doi:10.1038/s41467-025-56610-6), 2025-02-04
Supplement: 41467_2025_56610_MOESM2_ESM.pdf [file 41467_2025_56610_MOESM2_ESM.pdf]

## Description of Additional Supplementary Files

**Supplementary Data 1.** Coordinates of the DFT optimised QM cluster models (abbreviations as introduced in Table S5). Atoms fixed to the experimentally determined positions are marked with an f.

**Supplementary Data 2.** AzeJ homologues used in phylogenetic analysis.
